1

2

3 Striatal fast-spiking interneurons drive habitual behavior

4

5 Justin K. O'Hare<sup>1,2</sup>, Haofang Li<sup>3</sup>, Namsu Kim<sup>3</sup>, Erin Gaidis<sup>3</sup>, Kristen K. Ade<sup>1,2</sup>, Jeffrey M. Beck<sup>1</sup>,

6 Henry H. Yin<sup>3</sup>, Nicole Calakos<sup>1,2</sup>

7 <sup>1</sup>Department of Neurobiology, Duke University Medical Center, Durham, NC 27710.

8 <sup>2</sup>Department of Neurology, Duke University Medical Center, Durham, NC 27710.

9 <sup>3</sup>Department of Psychology & Neuroscience, Duke University, Durham, NC 27710.

10

11 Correspondence: [nicole.calakos@duke.edu](mailto:nicole.calakos@duke.edu)

12

13

14

15

16 **Abstract**

17

18 Habit formation is a behavioral adaptation that automates routine actions. Habitual behavior

19 correlates with broad reconfigurations of dorsolateral striatal (DLS) circuit properties that increase

20 gain and shift pathway timing. The mechanism(s) for these circuit adaptations are unknown and could

21 be responsible for habitual behavior. Here we find that a single class of interneuron, fast-spiking

22 interneurons (FSIs), modulates all of these habit-predictive properties. Consistent with a role in

23 habits, FSIs are more excitable in habitual mice compared to goal-directed and acute chemogenetic

24 inhibition of FSIs in DLS prevents the expression of habitual lever pressing. *In vivo* recordings further

25 reveal a previously unappreciated selective modulation of SPNs based on their firing patterns; FSIs

26 inhibit most SPNs but paradoxically promote the activity of a subset displaying high fractions of

27 gamma-frequency spiking. These results establish a microcircuit mechanism for habits and provide a

28 new example of how interneurons mediate experience-dependent behavior.

29

30

31

## 32 Introduction

33 Habit formation is an adaptive behavioral response to frequent and positively reinforcing experiences.  
34 Once established, habits allow routine actions to be triggered by external cues. This automation frees cognitive  
35 resources that would otherwise process action-outcome relationships underlying goal-directed behavior. The  
36 dorsolateral region of the striatum has been heavily implicated in the formation and expression of habits  
37 through lesion and inactivation studies<sup>2, 3</sup>, *in vivo* recordings<sup>4, 5</sup>, and changes in synaptic strength<sup>6</sup>. More  
38 recently, properties of the dorsolateral striatum (DLS) input-output transformation of afferent activity to striatal  
39 projection neuron firing were found to predict the extent of habitual behavior in individual animals<sup>7</sup>. Despite  
40 these observations, the cellular microcircuit mechanisms driving habitual behavior have not been identified.

41

42 DLS output arises from striatal projection neurons (SPNs), which comprise ~95% of striatal neurons  
43 and project to either the direct (dSPNs) or indirect (iSPNs) basal ganglia pathways. The properties of evoked  
44 SPN firing *ex vivo* linearly predict behavior across the goal-directed to habitual spectrum in an operant lever  
45 pressing task<sup>7</sup>. Specifically, habitual responding correlates with larger evoked responses in both the direct and  
46 indirect pathways as well as a shorter latency to fire of dSPNs relative to iSPNs. To identify a microcircuit  
47 mechanism for habitual behavior, we manipulated the striatal microcircuitry to identify local circuit elements  
48 that modulated these habit-predictive SPN firing properties (Fig. 1A, B).

49

50 Glutamatergic corticostriatal synapses express dopamine-dependent forms of long-lasting synaptic  
51 potentiation and depression<sup>8</sup>, making these connections a fitting site for experience-dependent adaptation of  
52 striatal output. Although such plasticity accompanies changes in behavior, including the formation of habits<sup>6, 9</sup>,  
53 it does not readily explain the finding that increased gain in the direct and indirect SPNs in habitual mice was  
54 balanced<sup>7</sup> since synaptic strengthening would occur separately on the two SPN classes through dichotomous  
55 mechanisms<sup>8</sup>. In addition, within the DLS, habit-predictive SPN firing properties were distributed uniformly  
56 rather than in discrete subpopulations of SPNs<sup>7</sup>. Because interneurons are often anatomically suited to tune

57 SPN activity in a similarly broad manner through extensive axonal arbors<sup>10, 11</sup>, we hypothesized that plasticity  
58 of striatal interneurons might underlie the habit-associated changes in striatal output.

59  
60 Among the various interneuron types resident to the striatum<sup>11</sup>, parvalbumin-positive, fast-spiking  
61 interneurons (FSIs) provide the strongest source of local modulation, exerting strong, feedforward inhibition of  
62 SPNs via perisomatic GABAergic contacts onto virtually all SPNs<sup>12-18</sup>. Notably, FSIs are expressed in the  
63 dorsal striatum on a mediolateral gradient with the most residing in DLS<sup>19</sup>. FSIs also preferentially innervate  
64 dSPNs relative to iSPNs<sup>12</sup>, suggesting a potential mechanism by which FSI-mediated inhibition could allow  
65 iSPNs to fire before dSPNs in response to coincident excitatory input. Based on these considerations, we  
66 hypothesized that FSIs might drive the habit-predictive circuit features through a disinhibitory mechanism that  
67 would promote SPN firing and a preferentially earlier activation of the direct pathway. Striatal FSI plasticity has  
68 been demonstrated through experimenter-induced activity and genetic manipulations<sup>20-23</sup>, but it remains  
69 unknown whether dorsal striatal FSIs undergo plasticity normally in the context of experience-dependent  
70 adaptive behavior.

71  
72 Using pharmacological and optogenetic manipulations, we found that striatal FSIs modulate the  
73 pathway-specific properties of DLS output that predict habitual behavior. Surprisingly though, silencing FSIs  
74 produced the opposite directionality for each habit-predictive circuit feature, suggesting that an increase, rather  
75 than decrease, in FSI activity might drive habitual behavior. Indeed, when FSI firing was evoked *ex vivo* by  
76 stimulation of cortical afferents, FSIs from habitual mice fired more readily than FSIs from goal-directed mice.  
77 To test the significance of this plasticity for the expression of habitual behavior, we acutely inhibited FSIs in  
78 DLS chemogenetically. Inhibiting FSIs in habit-trained mice blocked habit expression, but not lever-pressing  
79 *per se*, while identically-trained control subjects displayed robust habitual behavior. *In vivo* recordings revealed  
80 that the effects of FSI activity on striatal output appear to be more selective than previously appreciated. While  
81 FSIs exert the expected strongly inhibitory influence over DLS output, they also promote activity in a subset of

82 SPNs that can be identified *a priori* based upon individual SPN firing patterns. Our results identify a  
83 mechanism for habit by which FSI strengthening reconfigures DLS output and promotes the expression of  
84 habitual behavior.

85

## 86 **Results**

### 87 **Inhibiting fast-spiking interneurons drives a striatal circuit endophenotype opposite that of** 88 **habitual behavior**

89 To manipulate FSI activity, the calcium-permeable AMPA receptor (CP-AMPA) antagonist  
90 IEM-1460, which predominantly weakens excitatory synaptic inputs onto FSIs in striatum<sup>24</sup>, was used.  
91 Striatal FSIs express AMPARs lacking the GluA2 subunit, rendering them permeable to calcium<sup>25</sup>,  
92 whereas SPNs do not typically express CP-AMPARs. Consistent with this difference in AMPAR  
93 subunit expression, IEM-1460 does not affect excitatory synaptic currents in SPNs but strongly  
94 decreases excitatory transmission onto FSIs<sup>24</sup>. Cell-attached FSI recordings before and after  
95 exposure to IEM-1460 (50 $\mu$ M) confirmed the drug's efficacy to reduce synaptically-evoked AP firing in  
96 our acute parasagittal DLS preparation (Figure 1 – figure supplement 1). To first approximate how  
97 FSIs modulate the habit-predictive properties of evoked striatal output, the same *ex vivo* population  
98 calcium imaging approach that identified the behavior-predictive properties<sup>7</sup> was used on tissue  
99 prepared from untrained animals (Fig. 1A, B). Firing responses evoked by electrical activation of  
100 cortical afferents were measured in dozens of pathway-defined SPNs of both types simultaneously  
101 using the calcium indicator dye fura-2AM, the *Drd1a*-tdTomato<sup>26</sup> reporter, and vector-mode two-  
102 photon laser scanning microscopy (2PLSM) (Fig. 1A; see Materials and methods). Action potential  
103 responses were detected by cross-correlation analysis with a template waveform that was obtained  
104 from single-action potential responses during simultaneous cell-attached electrophysiological

105 recordings for each SPN subtype (see Materials and methods). Firing properties were compared  
106 within-cell before and after wash-in of IEM-1460.

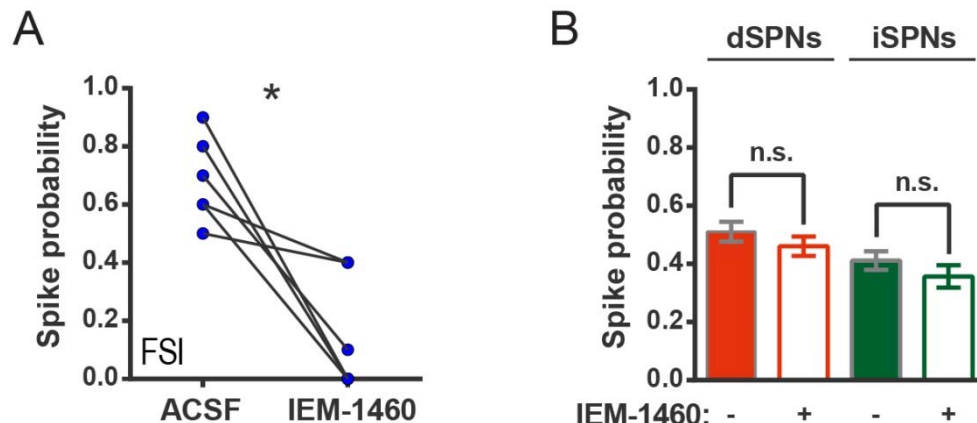

107 **Figure 1 – figure supplement 1.**

**IEM-1460 inhibits evoked FSI firing but does not affect SPN spike probability.**

(A) Probability of evoked FSI action potential firing, as measured in cell-attached recordings, before and after wash-in of IEM-1460. Drug wash-in significantly inhibited FSI firing ( $t(5) = 4.08$ ,  $p = 0.0096$ ,  $n = 6$  cells). (B) Spike probability for dSPNs (red) and iSPNs (green) before (filled) and after (open) wash-in of IEM-1460 in 2PLSM calcium imaging experiments. Drug wash-in did not affect spike probability for dSPNs ( $p = 0.055$ ,  $n = 87$ ) or iSPNs ( $p = 0.11$ ,  $n = 52$ ). \* $p < 0.05$ . Error bars represent SEM.

109 IEM-1460 decreased the amplitude of evoked calcium transients in both dSPNs ( $t(86) = 3.42$ ,  $p$   
110  $= 0.001$ ,  $n = 87$ ) and iSPNs ( $t(51) = 2.11$ ,  $p = 0.040$ ,  $n = 52$ ). IEM-1460 also changed the relative  
111 latency to fire between direct and indirect pathway SPNs by increasing the pre-existing bias in relative  
112 pathway timing whereby iSPNs tend to respond to cortical excitation more quickly than dSPNs (Fig.  
113 1F) (mean absolute latency values for dSPNs:  $144.03 \pm 7.08$  ms ACSF,  $154.33 \pm 7.92$  ms IEM-1460,  
114  $N = 87$ ; iSPNs:  $130.31 \pm 7.87$  ms ACSF,  $134.43 \pm 8.89$  ms IEM-1460,  $N = 52$ ).

115  
116 Upon closer inspection, the decrease in calcium transient amplitude seen at the population  
117 level appeared to be dominated by the subset of SPNs with larger baseline responses (for example,  
118 see brightest red cells before wash-in in Fig. 1C). To determine whether there was selectivity for IEM-  
119 1460's effects on SPNs with large basal responses, calcium transient amplitude was used as a  
120 feature to classify SPNs as having large or small evoked calcium transients prior to drug wash-in.

121 Rather than specifying an arbitrary cutoff value for the transient amplitude, we used an unsupervised  
 122 clustering algorithm known as a Gaussian mixture model (GMM) to separate SPNs into two clusters.  
 123 Based on calibration data in this preparation demonstrating the relationship between calcium

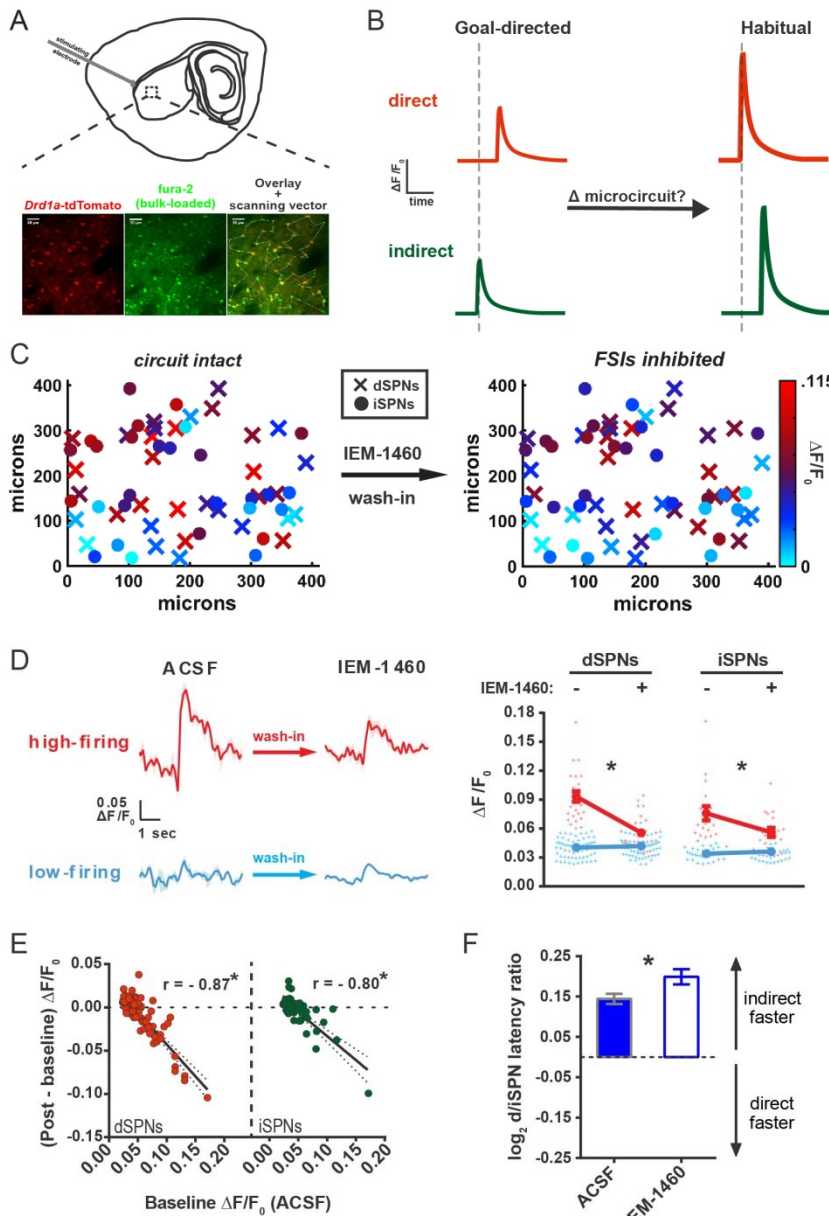

**Figure 1.**

**Striatal output reconfiguration following pharmacological inhibition of FSIs directly opposes substrates for habitual behavior.**

(A) Schematic of calcium imaging approach. Top: SPN activity was evoked by electrical stimulation of cortical afferent fibers in an acute parasagittal brain slice. Bottom: Evoked SPN firing was imaged in the direct and indirect pathways simultaneously using a transgenic direct pathway reporter mouse line (left), calcium indicator dye fura-2 (middle) and two-photon laser scanning microscopy (right, see scanning vector in overlay). (B) Experimental approach. Striatal microcircuitry was manipulated in tissue from untrained animals in order to reproduce the known circuit substrate for habitual behavior (described in O'Hare & Ade, et al. 2016) and thereby identify a candidate microcircuit mechanism. (C) Representative heat maps of dSPN (x) and iSPN (•) calcium transient amplitudes before (left) and after (right) pharmacological inhibition of FSIs using IEM-1460 show a selective reduction in cells with the strongest (bright red) initial responses. (D) Left: Representative SPN calcium transient waveforms before and after wash-in of IEM-1460. SPNs were grouped into "high-firing" (red) or "low-firing" (blue) clusters based solely on their baseline response amplitudes using a Gaussian mixture model. SPNs with strong baseline responses (red, "high firing") show weaker responses after wash-in whereas those with initially weak responses (blue, "low firing") are unaffected. Right: Evoked calcium transient amplitudes for all imaged SPNs before (-) and after (+) wash-in of IEM-1460. For both cell types, high-firing SPNs showed decreased responses after IEM-1460 wash-in (dSPNs:  $t(22) = 6.43$ ,  $p = 0.0000018$ ,  $n = 23$  cells; iSPNs:  $t(17) = 3.43$ ,  $p = 0.0032$ ,  $n = 18$  cells) whereas low-firing SPNs did not (dSPNs:  $p = 0.24$ ,  $n = 64$  cells; iSPNs:  $p = 0.21$ ,  $n = 34$  cells). (E) Linear regression and correlational analyses show that the inhibitory effect of IEM-1460 on SPN responses (post - baseline difference) is a linear function of baseline response amplitudes for both dSPNs (red;  $r(86) = -0.87$ ,  $p = 2.20 \times 10^{-28}$ ,  $n = 87$  cells) and iSPNs (green;  $r(51) = -0.80$ ,  $p = 1.59 \times 10^{-12}$ ,  $n = 52$  cells). (F) Relative pathway timing, as measured by latency to peak detection, before and after inhibition of FSIs using IEM-1460. Indirect pathway activation precedes direct pathway activation by a greater margin after wash-in of IEM-1460 ( $t(102) = 2.42$ ,  $p = 0.017$ ,  $n = 52$  independent dSPN/iSPN pairs). \* $p < 0.05$ . Dotted error bands indicate 95% confidence interval. Error bars indicate SEM.

124 transient amplitude and number of action potentials<sup>7</sup>,  
 125 the GMM separated SPNs into clusters corresponding  
 126 to multi-action potential (larger transients; "high-firing")  
 127 and single-action potential (smaller transients; "low-firing") responses (Fig. 1D). Compared to the use  
 128 of a physiologically-based 0.05  $\Delta F/F_0$  cutoff value, the unbiased GMM classification was in 90.5%

129 agreement. According to this pre-IEM-1460 categorization, low-firing SPNs were unaffected whereas  
130 calcium transient amplitudes of high-firing SPNs were significantly reduced by IEM-1460 (Fig. 1D).

131

132 This selective relationship was also borne out by examining the relationship between basal  
133 calcium transient amplitude and the magnitude of IEM-1460 effect. Consistent with a selective  
134 inhibition of multi-action potential responses, basal calcium transient amplitudes linearly predicted the  
135 inhibitory effect of IEM-1460 in both SPN subtypes (Fig. 1E). Moreover, IEM-1460 did not affect spike  
136 probability in either SPN subtype (Figure 1 – figure supplement 1). These pharmacological  
137 experiments in acute brain slices indicate that IEM-1460 promotes an indirect pathway timing  
138 advantage and selectively diminishes multi-action potential evoked SPN responses.

139

#### Figure 1 – source data 1

##### GMM parameters and source data for SPN calcium transient amplitudes (MATLAB).

GMMs contains parameters for the Gaussian mixture model fits on pre-IEM-1460 calcium transient amplitude data by cell type. Amplitude values are included for high- and low-firing dSPNs and iSPNs in dSPNs\_high, dSPNs\_low, iSPNs\_high, and iSPNs\_low. Matrices are N x 2 with column 1 containing pre-drug amplitudes and column 2 containing paired measurements after drug wash-in. Data can be combined within cell type and run through PrePostGMM.m to reproduce the clustering shown in Figure 1D (see comments in code).

140

141

142 To test whether IEM-1460 selectively inhibited multi-spike SPN responses without inferring  
143 action potentials through calcium imaging, we used conventional electrophysiological methods to  
144 record cortically-evoked SPN firing in cell-attached mode. Brief single-pulse electrical stimuli (300 -  
145 600  $\mu$ s) were calibrated to elicit a stable multi-action potential response in SPNs prior to taking a  
146 baseline measurement. Responses to the same stimulus were then recorded after wash-in of IEM-  
147 1460 or vehicle. Consistent with the calcium imaging results, IEM-1460 decreased evoked SPN firing



148 (t(7) = 2.37, p = 0.029, n = 8) while vehicle had no significant effect (p = 0.76, n = 8). Moreover, the  
149 same selectivity for modulating multi-action potential responses was observed in that the magnitude  
150 of IEM-1460's effect correlated with the size of baseline responses and there was no effect on single-  
151 action potential responses (Figure 1 – figure supplement 2). This result confirms that IEM-1460, which  
152 inhibits FSI firing (Figure 1 – figure supplement 1), selectively reduces multi-action potential SPN  
153 responses to afferent stimulation (Figure 1 – figure supplement 2) as suggested by calcium imaging  
154 experiments (Figure 1F).

155

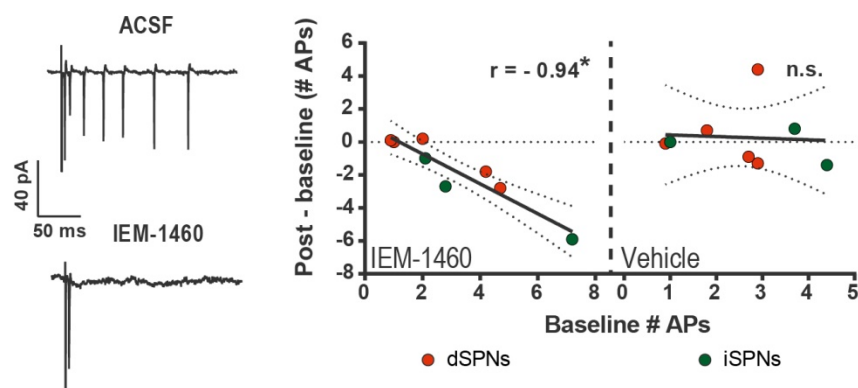

156

**Figure 1 – figure supplement 2.**

**IEM-1460 selectively inhibits evoked multi-action potential SPN responses *ex vivo*.**

Cell-attached electrophysiological recordings showing selective effect of IEM-1460 for multi-action potential SPN responses to afferent stimulation. Left: example trace showing multi-action potential SPN response to single-pulse stimulation of cortical afferents (top) and response to same stimulus after drug wash-in (bottom). Right: Effect of IEM-1460 (left) and vehicle (right) as a function of mean # APs fired prior to drug wash-in. IEM-1460 consistently reduced SPN responses to singlets ( $r(7) = 0.94$ ,  $p = 0.00060$ ,  $n = 8$  cells) whereas vehicle had no such effect (mean effect =  $0.28 \pm 0.66$ ;  $p = 0.89$  for correlational analysis,  $n = 8$  cells). \* $p < 0.05$ . Dotted error bands indicate 95% confidence interval.

157

158 Altogether, this series of experiments identifies a pharmacological agent that potently inhibits  
159 FSI activity and modulates all of the habit-predictive SPN firing properties. These results were  
160 surprising for two reasons. First, rather than a blockade of FSI activity causing disinhibition of SPNs  
161 as we had hypothesized, we found that when FSI activity was reduced, SPN activity was also  
162 reduced. This result suggests that FSI activity is capable of promoting, rather than inhibiting, SPN  
163 activity at least in the acute brain slice preparation. Secondly, although IEM-1460 strikingly affected

164 the same features of DLS output that predict the expression of habitual behavior (calcium transient  
165 amplitude in both pathways and relative pathway timing)<sup>7</sup>, the directionality of these effects was  
166 opposite in all measures. Therefore, these results revise the overall hypothesis to involve a *gain*,  
167 rather than loss, of FSI activity as a candidate mechanism for habitual behavior.

### 168

## 169 **Parvalbumin-positive interneurons selectively promote multi-action potential SPN responses** 170 **to cortical excitation *ex vivo***

171 While IEM-1460 has been shown to have selective effects on the firing of FSIs in striatum, its  
172 effect of inhibiting AMPAR-mediated excitatory postsynaptic currents (EPSCs) in cholinergic  
173 interneurons (CINs)<sup>24</sup> leaves open the possibility that CINs might contribute to our observed IEM-  
174 1460 effects. In addition the experimental design of within-cell imaging of pre/post IEM-1460 effects does not  
175 exclude a potential contribution of prolonged imaging time to the effects attributed to IEM-1460. To isolate the  
176 effects of FSIs and in a time-variable controlled manner, the light-activated hyperpolarizing proton  
177 pump Archaeorhodopsin-3 fused to green fluorescent protein (Arch-GFP) was Cre-dependently  
178 expressed in parvalbumin (PV)-expressing cells. PV-Cre mice were crossed to a line which Cre-  
179 dependently expressed Arch-GFP. Control experiments showed that, as predicted, 532 nm light  
180 drove outward currents in FSIs but not SPNs (Fig. 2 – figure supplement 1). Additionally, Arch  
181 expressed in PV+ cells (PV-Arch) abolished high-frequency firing of FSIs in response to somatic  
182 current injection (Fig. 2 – figure supplement 1) and had no effect on SPN firing in the same recording  
183 configuration (Fig. 2 – figure supplement 1).

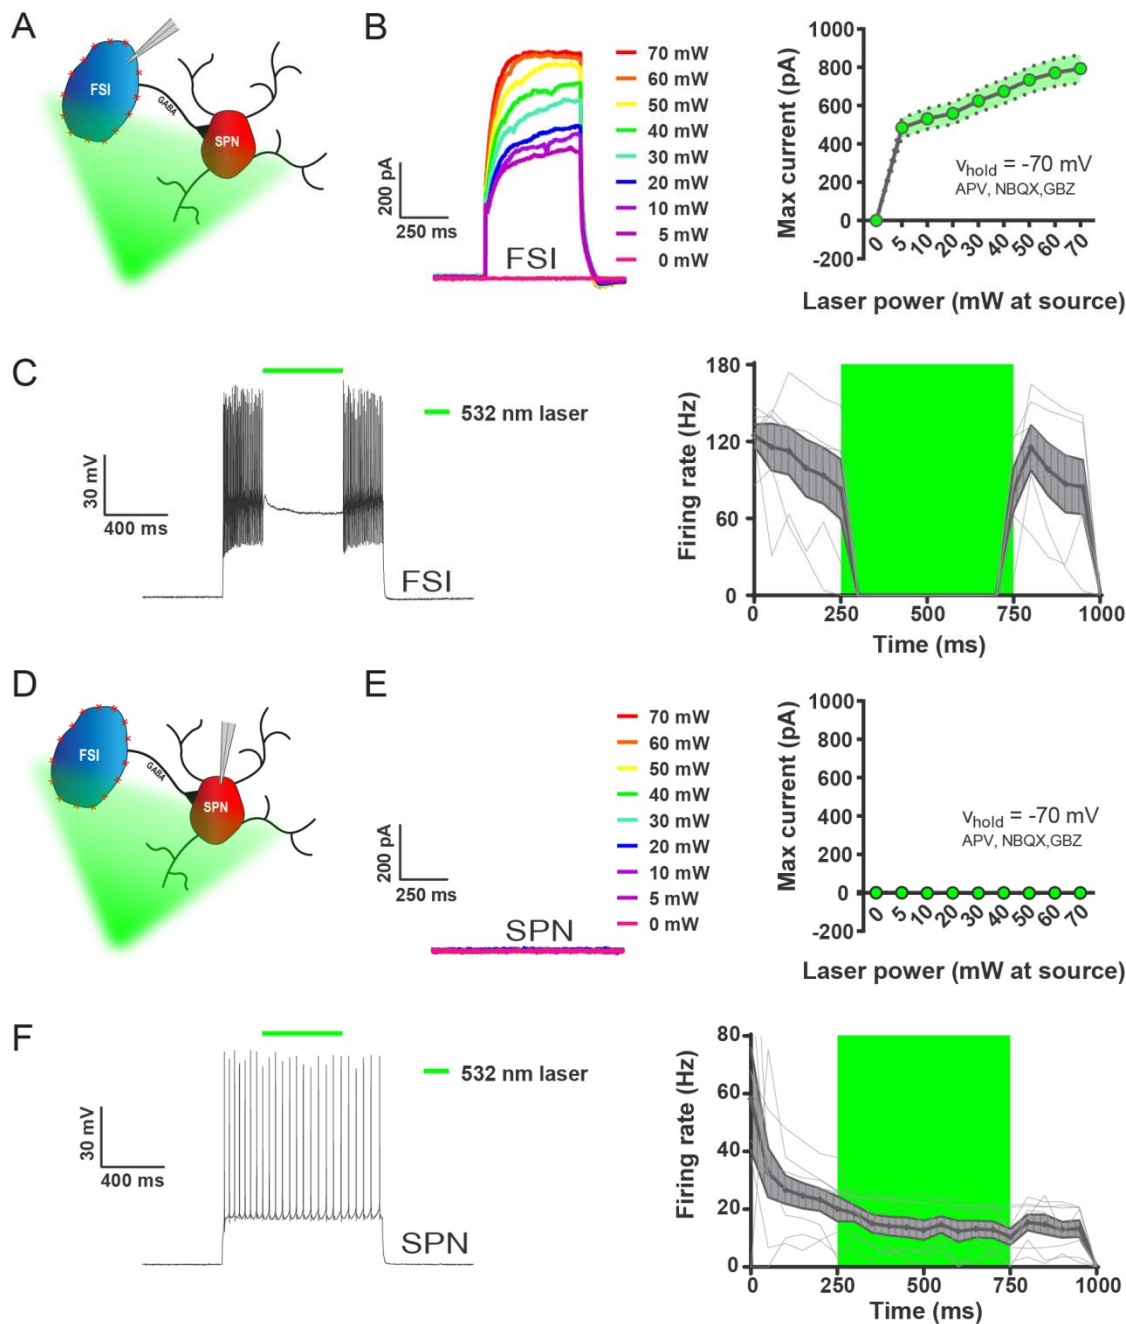

187

## Figure 2 – figure supplement 1.

### 532 nm light selectively inhibits FSIs in PV-Arch mice *ex vivo*.

(A) Recording configuration used to verify optical inhibition of FSIs in (B-C). (B) Light-driven currents in Arch-expressing FSIs measured in voltage clamp with synaptic blockers. Left: representative traces showing FSI response to increasing intensities of 532 nm light. Right: quantification of light-driven currents in FSIs ( $n = 4$ ). Dotted error bands indicate SEM. (C) Arch-mediated current suppresses high-frequency firing driven by somatic current injection in FSIs. Left: example trace of FSI response to somatic current injection with an interposed 500 ms pulse of 532 nm light (green bar). Right: Mean FSI responses show that 532 nm light reliably abolishes high-frequency firing ( $F(1.20, 5.99) = 19.66, p = 0.0037, n = 6$  cells). Fine grey lines indicate individual FSI recordings. Data are represented as mean  $\pm$  SEM. (D) Left: recording configuration to assess off-target effects of 532 nm light on SPN firing in (E-F). (E) SPN responses to 532 nm light measured in voltage clamp as in (B). Left: representative trace showing SPN response to increasing intensities of 532 nm light. Right: quantification of light-driven currents in SPNs ( $n = 5$ ). (F) SPN responses to somatic current injection with interposed 532 nm light as in (C). Although analysis of variance showed an effect of laser on SPN firing ( $F(1.04, 7.27) = 9.80, p = 0.015, n = 8$ ), this effect was due to an early frequency adaptation which SPNs are known to display in response to suprathreshold excitation<sup>1</sup>. SPN firing rates during and after laser stimulation were indistinguishable ( $p = 0.31, n = 8$ ).

188

189 To examine the contribution of FSI activity to SPN firing, cortically-evoked SPN action  
190 potentials were recorded in cell-attached mode, as in the cell-attached IEM-1460 experiments, while  
191 nearby PV+ interneurons (~0.5 mm radius from recorded SPN) were silenced in alternating trials with  
192 532 nm light exposure (Fig. 2A). In this configuration, PV-Arch effectively blocked evoked FSI firing  
193 (Fig. 2B). We found that optical inhibition of PV+ interneurons reliably decreased evoked SPN firing  
194 (Fig. 2C, left and middle panels). Given that IEM-1460 selectively reduced the probability of multi-  
195 action potential SPN responses, we examined whether optical inhibition of PV+ neurons had a similar  
196 selectivity. Analysis of SPN responses by trial (paired consecutive laser OFF/ON sweeps), rather  
197 than by cell, indicated that single-action potential events and failures were unaffected when FSIs  
198 were silenced (Fig. 2C, right panel). Moreover, a single-exponential fit of all trial-by-trial data showed  
199 a selective contribution of FSIs to multi-spike SPN responses (Fig. 2C, right panel). Consistent with  
200 the IEM-1460 results in 2PLSM calcium imaging (Fig. 1D-E) and cell-attached recording (Fig. 1 –  
201 figure supplement 2) experiments, this optogenetic result indicates that FSIs promote multi-action  
202 potential SPN responses to cortical excitation in the brain slice and that the effects of IEM-1460 on  
203 striatal output occur primarily through a reduction of striatal FSI activity.

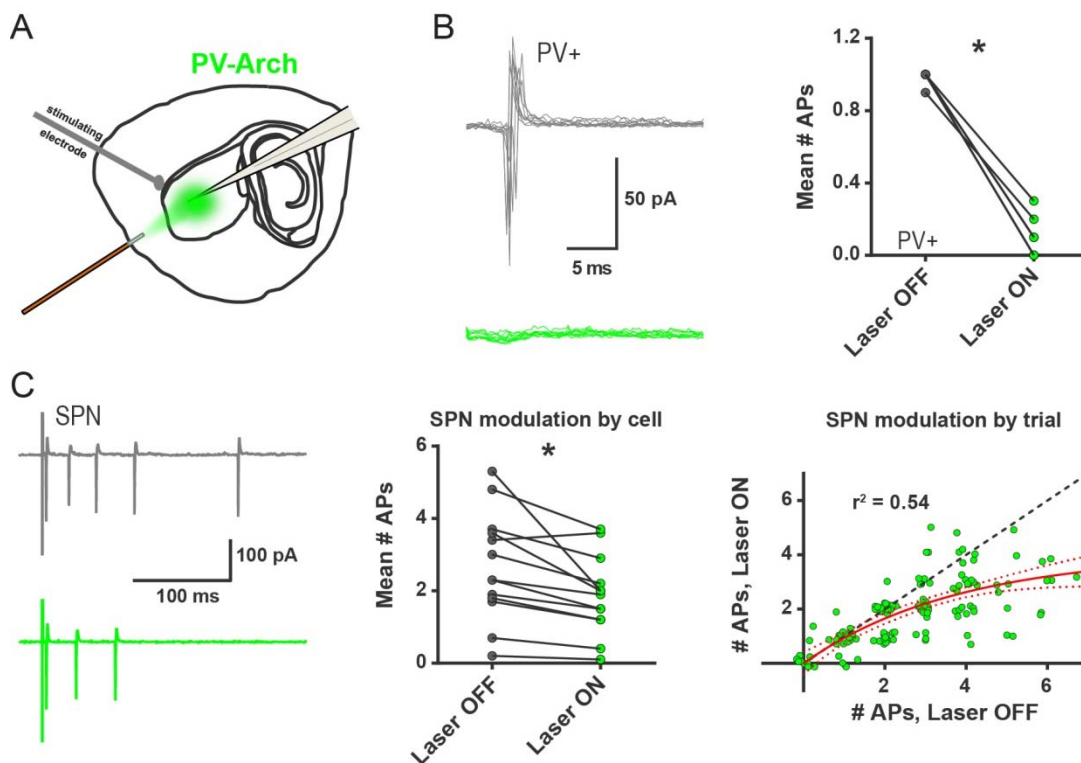

**Figure 2.**

***Ex vivo* optogenetic inhibition of FSIs selectively reduces evoked multi-action potential SPN responses.**

(A) Experimental setup to record cortically-evoked action potentials in cell-attached mode with interleaved optogenetic inhibition of striatal FSIs. (B) Example traces (left) and mean number of APs (right) for evoked FSI firing with laser off (grey) and on (green). 532 nm light strongly inhibits evoked FSI firing ( $t(5) = 15.54$ ,  $p = 0.000020$ ,  $n = 6$  cells). (C) Evoked SPN action potential firing with interleaved optical inhibition of striatal FSIs. Left: Example traces showing consecutive sweeps of evoked multi-AP SPN firing with laser off (grey) and on (green). Middle: Mean number of evoked SPN APs with laser off (grey) and on (green). Inhibition of striatal FSIs caused SPNs to fire fewer action potentials ( $t(12) = 3.33$ ,  $p = 0.0060$ ,  $n = 13$  cells). Right: Data in middle plot shown as individual laser ON-OFF paired trials instead of by cell. Black dashed line denotes hypothetical regression line if laser had no effect. Data were jittered in x and y with Gaussian  $N(0, 0.15)$  to visualize overlapping points. Single exponential fit consistent with specific laser effect on multi-AP SPN responses ( $\tau = 13.78$ ,  $r^2(127) = 0.54$ ,  $n = 130$  paired trials from 13 cells). \* $p < 0.05$ . Dotted error bands indicate 95% confidence interval.

**FSIs undergo long-lasting plasticity to become strengthened with habit formation**

While results thus far show that FSIs appear capable of specifically modulating habit-predictive properties of striatal output, we next examined whether FSI activity was different as a result of experience. We measured FSI synaptic and cellular electrophysiological properties in DLS brain slices prepared from habitual and goal-directed mice.

213 PV-Cre mice were bilaterally injected with AAV5-Ef1a-DIO-EYFP in the DLS to label PV+  
214 interneurons and subsequently trained on an operant task in which they learned to press a lever for  
215 sucrose pellet rewards. Lever presses were reinforced on a random interval (RI) schedule to induce  
216 habit formation<sup>27, 28</sup> or on an abbreviated random ratio (RRshort) schedule to produce goal-directed  
217 behavior<sup>7</sup> (Fig. 3 – figure supplement 1). Habit was measured by evaluating the sensitivity of the  
218 learned lever press behavior to devaluation of the sucrose pellet reward. Goal-directed performance  
219 is known to be highly sensitive to outcome devaluation whereas habitual performance is less  
220 sensitive<sup>27-29</sup>. The sucrose pellet reward was devalued by inducing sensory-specific satiety.  
221 Specifically, mice were pre-fed with the reward pellets, or as a control for general satiety-related  
222 behavioral changes, identically-sized normal grain pellets. On separate but consecutive days, mice  
223 were alternately pre-fed 1.3 g of either the sucrose pellet reward (devalued condition) or the grain-  
224 only pellet (non-devalued condition), counterbalancing which pre-feed condition was tested first.  
225 Lever press rates were then measured during brief 3-minute probe tests without reinforcement.  
226 Habitual behavior was quantified in individual mice as the  $\log_2$  ratio of the devalued versus non-  
227 devalued lever press rates (normalized devalued lever press rate;  $\text{NDLP}_r$ ). RI-trained mice with an  
228  $\text{NDLP}_r \geq 0$ , i.e. insensitive to outcome devaluation, were considered to be habitual. RRshort-trained  
229 mice with an  $\text{NDLP}_r < 0$  were considered to be goal-directed (Fig. 3 – figure supplement 1, shaded  
230 regions). Mice not meeting either inclusion criterion were not used for the electrophysiological studies.

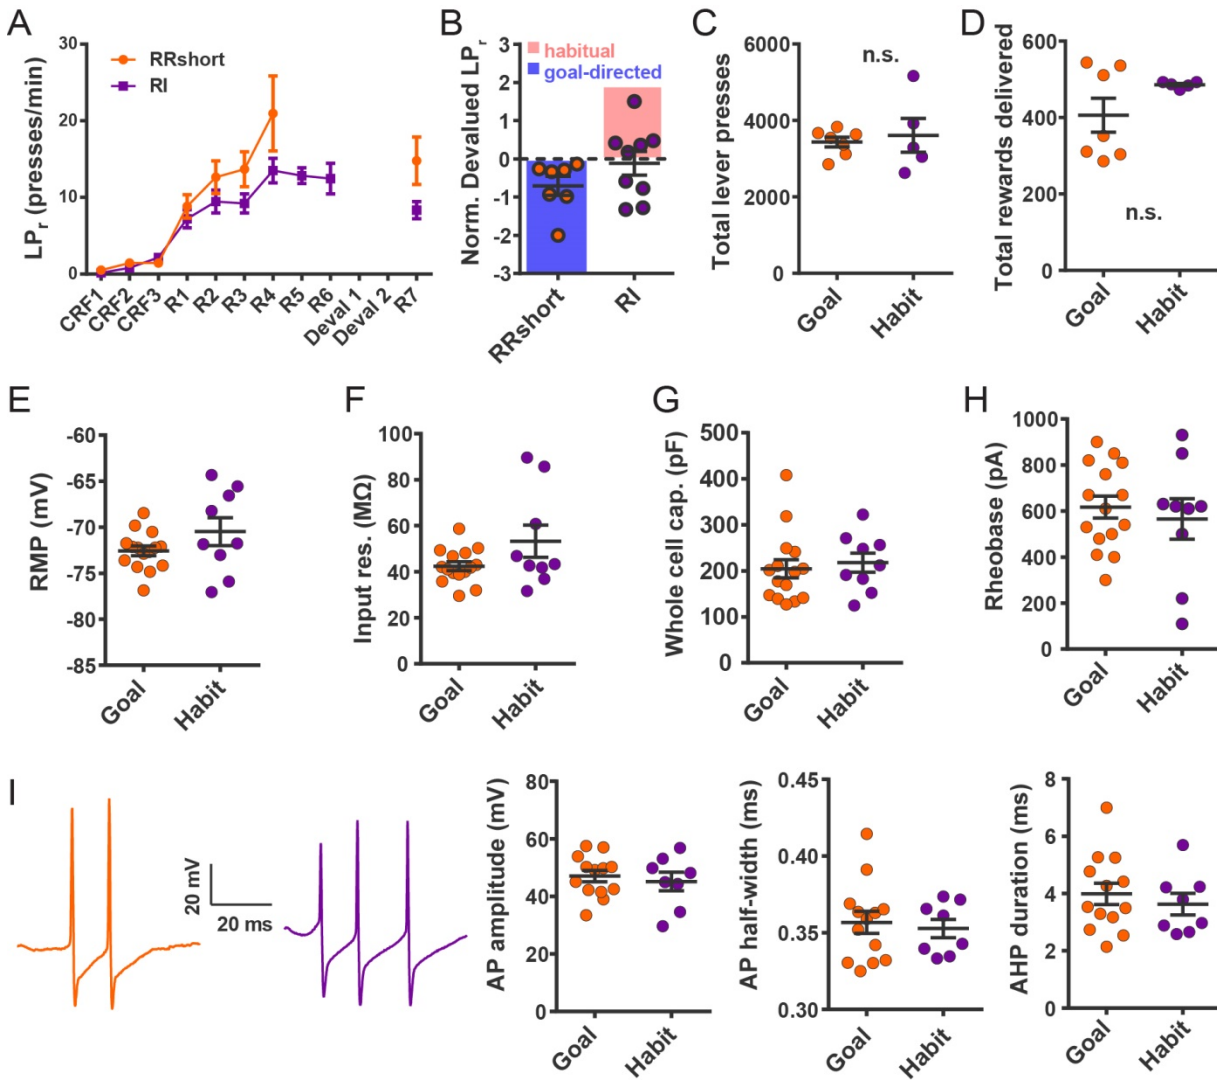

231

**Figure 3 – figure supplement 1.**

**Electrophysiological properties of FSIs from habitual and goal-directed mice.**

(A) Learning curves showing lever press rate over training sessions. Mice acquired lever pressing behavior with continuous reinforcement (CRF) of lever presses and were then trained on either random interval (RI) or abbreviated random ratio (RRshort) reinforcement schedules to induce habitual and goal-directed behavior, respectively. A final training session was administered after devaluation testing, and 0-24 hrs prior to recording, to mitigate any effects of devaluation testing. (B) Inclusion criteria for analysis of electrophysiological data. RRshort-trained mice that expressed goal-directed behavior ( $NDLP_r < 0$ ) and RI-trained mice that expressed habitual behavior ( $NDLP_r \geq 0$ ) were included. Mice that expressed modes of behavioral control inconsistent with training, i.e.  $NDLP_r < 0$  for RI-trained mice were excluded from analysis. (C-D) Goal-directed (orange) and habitual (purple) mice used for group-wise comparisons of electrophysiological properties did not differ in total number of lever presses ( $p = 0.72$ ,  $n = 7$  &  $5$  mice) or number of rewards delivered ( $p = 0.72$ ,  $n = 7$  &  $5$  mice, Mann-Whitney U test) over the course of training. (E-H) Passive membrane properties of FSIs in slices from goal-directed and habitual mice. No differences were found for any membrane property ( $p = 0.13$ ,  $0.081$ ,  $0.67$ ,  $0.58$ ,  $n = 15$  &  $9$  cells). (I) Left to right: representative action potential traces and quantification of action potential amplitude, half-width, and afterhyperpolarization current duration for FSIs from goal-directed and habitual mice. No difference was detected for any waveform property ( $p = 0.60$ ,  $0.71$ ,  $0.53$ ,  $n = 13$  &  $8$  cells). Data are represented as mean  $\pm$  SEM.

232

233

234

235

We first examined whether excitatory synaptic transmission onto FSIs was altered with habit formation. Spontaneous EPSCs (sEPSCs) were recorded in the presence of the GABA<sub>A</sub> receptor antagonist picrotoxin (50  $\mu$ M). No difference was detected in sEPSC frequency or amplitude between

236 goal-directed and habitual FSIs (Fig. 3A). Additionally, paired-pulse ratios of evoked EPSCs  
237 measured at a 50 ms inter-stimulus interval were similar between groups (Fig. 3B). During these  
238 recordings, we also did not observe any group differences in a number of passive membrane  
239 properties (Fig. 3 – figure supplement 1).

240

241 Rather than changes in synaptic strength, we instead found robust differences in FSI firing  
242 responses to somatic current injection. FSIs from habitual mice displayed higher firing rates  
243 compared to FSIs from goal-directed mice (Fig. 3C). Action potential kinetics did not appear to  
244 explain these group differences in firing rates as action potential waveforms were not appreciably  
245 different between groups (Fig. 3 – figure supplement 1). However, the duration over which firing could  
246 be sustained markedly differed between the two behavioral groups (Fig. 3D). The majority of FSIs  
247 from goal-directed mice were unable to maintain high-frequency firing for the entire duration of the  
248 500 ms current injection (< 250 ms of firing in 10/15 cells) whereas nearly all FSIs from habitual mice  
249 maintained such activity (> 450 ms firing in 7/9 cells). Interestingly, the distribution of goal-directed  
250 FSI response durations was strongly bimodal whereas that of habitual FSI response durations was  
251 not (Fig. 3D). The group difference in response durations explained the difference in firing rates  
252 between FSIs of habitual and goal-directed mice since, when firing rates were normalized to the  
253 duration of firing instead of duration of the current step, there was no longer a group difference in  
254 firing rate (Fig. 3E).



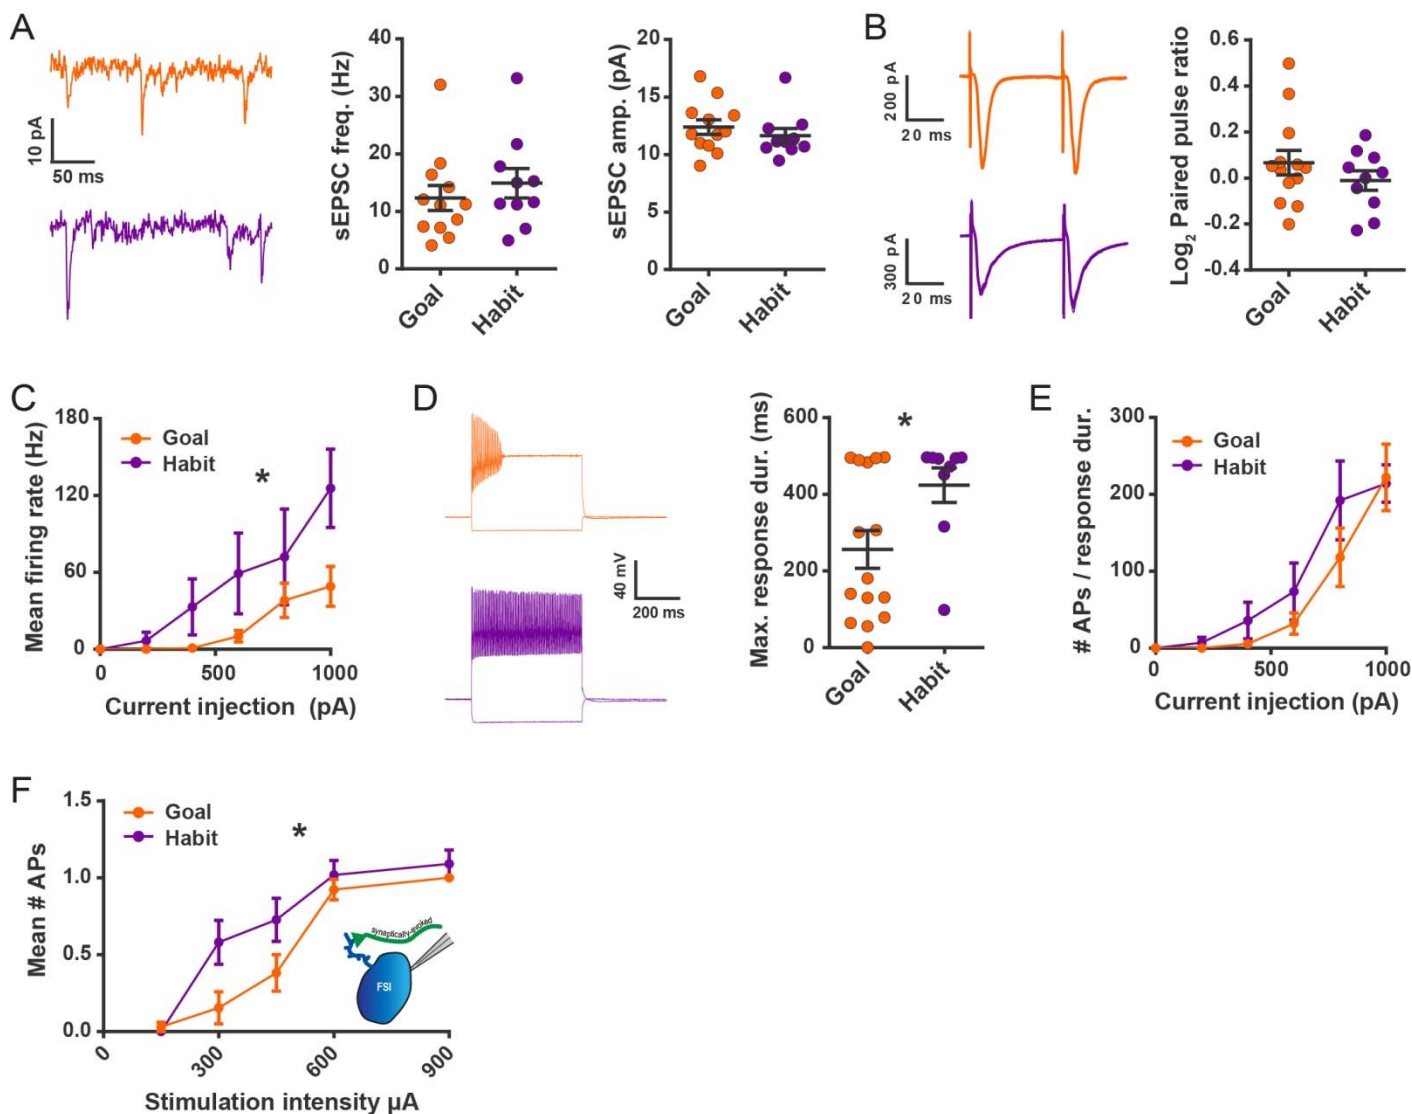

**Figure 3**

**Habit formation enhances sustained high-frequency firing and cortically-evoked action potential firing in DLS FSIs *ex vivo*.**

(A) sEPSCs in FSIs of goal-directed (orange) and habitual (purple) mice. Left: Example sEPSC traces. No effect of training was found in sEPSC frequency (middle,  $p = 0.45$ ,  $n = 12$  &  $10$  cells) or amplitude (right,  $p = 0.42$ ,  $n = 12$  &  $10$  cells). (B) Paired-pulse measurements in FSIs of goal-directed and habitual mice. Left: Example traces showing FSI responses to paired single-pulse stimuli spaced 50 ms apart. Right: Habitual behavior was not associated with a change in paired pulse ratio relative to goal-directed behavior ( $p = 0.29$ ,  $n = 13$  &  $10$  cells). (C) Input-output curve showing mean FSI firing rate in response to a series of increasing current steps. Habitual FSIs fired at an overall higher rate relative to goal-directed FSIs ( $F(1, 22) = 5.84$ ,  $p = 0.024$ ,  $n = 15$  &  $9$  cells). (D) FSI response durations, i.e. the time over which FSIs sustain firing. Left: Representative traces show that goal-directed FSIs often are unable to sustain firing for the duration of a 500 ms current step whereas habitual FSIs are typically able to do so. Right: Goal-directed FSIs are less-able to sustain firing than habitual FSIs ( $U = 34.5$ ,  $p = 0.049$ ,  $n = 15$  &  $9$  cells). Goal-directed response durations were bimodally distributed ( $p = 0.020$ , Hartigan's dip test). (E) Firing rates as in (C) normalized to response duration. When accounting for response duration, no difference in firing rates is observed ( $p = 0.25$ ,  $n = 15$  &  $9$  cells). (F) Input-output curve showing mean number of synaptically-evoked action potentials fired by goal-directed versus habitual FSIs in response to a series of increasingly strong single-pulse stimuli delivered to cortical afferent fibers. Responses recorded in cell-attached mode. Habitual FSIs fired more readily than goal-directed FSIs in response to afferent activation ( $F(1,22) = 4.77$ ,  $p = 0.040$ ,  $n = 13$  &  $11$  cells). \* $p < 0.05$ . Data are represented as mean  $\pm$  SEM.

Habitual behavior was associated with increased FSI firing in response to somatic current

injection. However, it was afferent activation that initially revealed habit-predictive striatal output

properties<sup>7</sup>. Therefore, in order for FSI plasticity to alter striatal output, it must be sufficient to differentially drive FSI firing in response to similar coincident synaptic excitation. FSI firing was monitored in cell-attached mode in response to electrical stimulation of excitatory afferents. We found that FSIs of habitual mice fired more readily than those from mice with goal-directed behavior (Fig. 3F). This habit-related difference in FSI excitability was not readily explained by other aspects of lever pressing performance including the total number of lever presses or rewards delivered over the course of training (Fig. 3 – figure supplement 1). We noted the apparent bimodal distribution of total rewards delivered for goal-directed subjects ( $p = 0.013$ , Hartigan's dip test; Fig. 3 – figure supplement 1) and wondered if the number of rewards received by an animal was related to the similarly-distributed FSI response durations to current injection (Fig. 3D). Instead, we found that response durations from both modes of the distribution were commonly found in FSIs from the same goal-directed mouse (for example, 494.7 and 180.9 ms). Together, these experiments show that FSIs undergo long-lasting, experience-dependent plasticity with habit formation and that this plasticity is sufficient to increase FSI firing.

### **FSI activity is required for the expression of a learned habit**

Since photo-inhibiting FSIs produces striatal output properties that directly oppose those seen in habit (Fig. 1), we inhibited FSIs after habit training to determine the necessity of FSI activity for expression of habitual behavior. Mice underwent habit-training protocols in the operant lever press task and then, prior to testing the degree of habitual responding. FSIs were inhibited chemogenetically. We selected a chemogenetic approach to allow for continuous modulation of activity during the 3 minute probe tests which measure habitual behavior. *Drd1a*-tdTomato<sup>26</sup>::PV-Cre mice were bilaterally injected in DLS with AAV vectors Cre-dependently encoding either the inhibitory hM4D chemogenetic receptor<sup>30</sup> (PV-hM4D) or eYFP (PV-eYFP) (Fig. 4A, B). Both groups underwent

the same habit-promoting RI reinforcement protocol and learned similarly (Fig. 4C). For both the devalued and non-devalued conditions, after each pre-feeding period and thirty minutes prior to the outcome devaluation probe tests, the hM4D agonist clozapine N-oxide (CNO, 5 mg/kg) was delivered intraperitoneally (Fig. 4D).

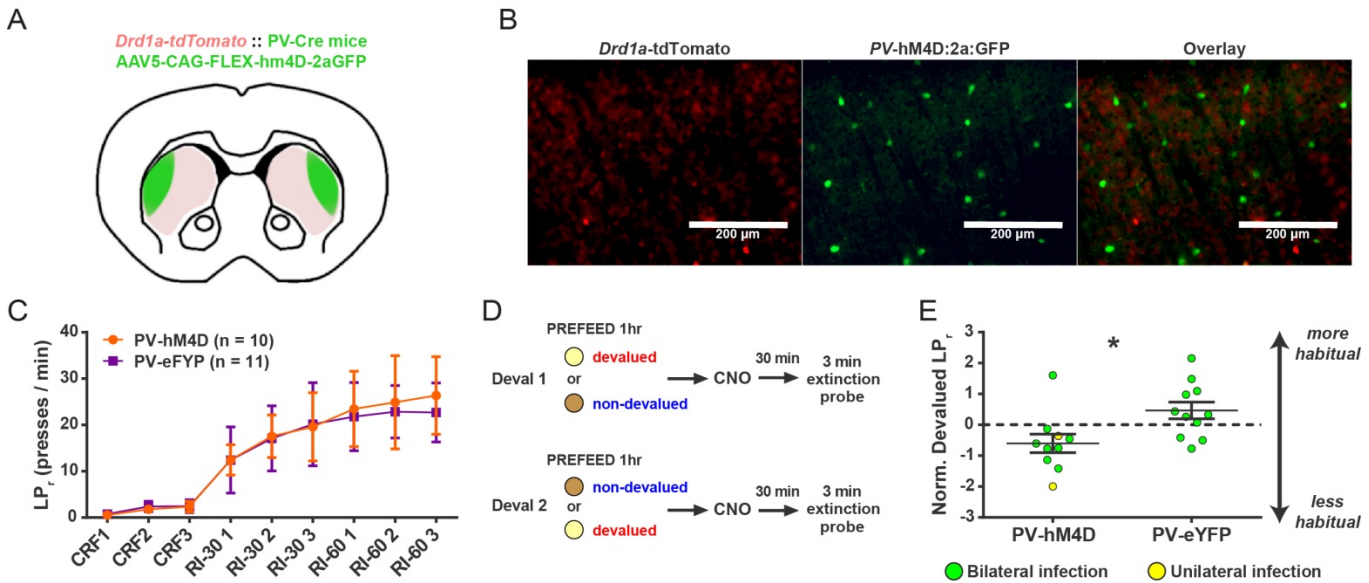

**Figure 4.**

**Acute chemogenetic inhibition of FSIs in dorsolateral striatum prevents expression of a learned lever pressing habit.**

(A) Diagram of coronal brain section showing tdTomato expression throughout striatum in dSPNs and expression of hM4D:2a:GFP construct in DLS. (B) Epifluorescent images of DLS showing tdTomato in dSPNs (left), GFP in PV+ cells (middle), and overlay (right). (C) Learning curves for hM4D and reporter construct-injected cohorts show that groups did not learn the task differently ( $p = 0.70$ ,  $n = 10$  &  $11$  mice). (D) Experimental flow of devaluation testing to evaluate habit expression. Upon completion of multi-day training sessions, mice were pre-fed sucrose or grain pellets on alternating days, intraperitoneally administered CNO, and subjected to a 3-minute extinction probe test 30 minutes later. Devalued (sucrose) and non-devalued (grain) lever press rates (LP<sub>r</sub>) are compared ratiometrically using the normalized devalued LP<sub>r</sub> (NDLP<sub>r</sub>) to assess habitual behavior:  $NDLP_r = \log_2 \frac{\text{devalued } LP_r}{\text{non-devalued } LP_r}$  (E) Quantification of habit expression in individual subjects using NDLP<sub>r</sub>. PV-hM4D mice showed less habit expression relative to PV-eYFP controls ( $t(19) = 2.66$ ,  $p = 0.016$ ,  $n = 10$  &  $11$  mice). \* $p < 0.05$ . Data are represented as mean  $\pm$  SEM.

Chemogenetic inhibition of PV+ interneurons did not affect operant behavior in general, as evidenced by indistinguishable lever press rates between groups in the non-devalued (grain pellets) condition (Fig. 4 – figure supplement 1). In contrast, a comparison of sensitivity to outcome devaluation between groups revealed that habit expression was suppressed in PV-hM4D mice relative to PV-eYFP controls (Fig. 4E). Mean NDLP<sub>r</sub> for RI-trained PV-EYFP control mice measured

296 at  $0.46 \pm 0.27$ , indicating that control mice were insensitive to outcome devaluation, i.e. habitual. By  
297 contrast, PV-hM4D mice, which received the same RI training schedule and showed comparable  
298 rates of lever pressing (Fig. 4C), displayed a mean  $NLDPr$  of  $-0.60 \pm 0.30$ . A negative  $NLDPr$  indicates  
299 sensitivity to outcome devaluation, i.e. goal-directed responding. These findings show that acute  
300 suppression of FSI activity in DLS causes habit-trained subjects to behave as though they were goal-  
301 directed.

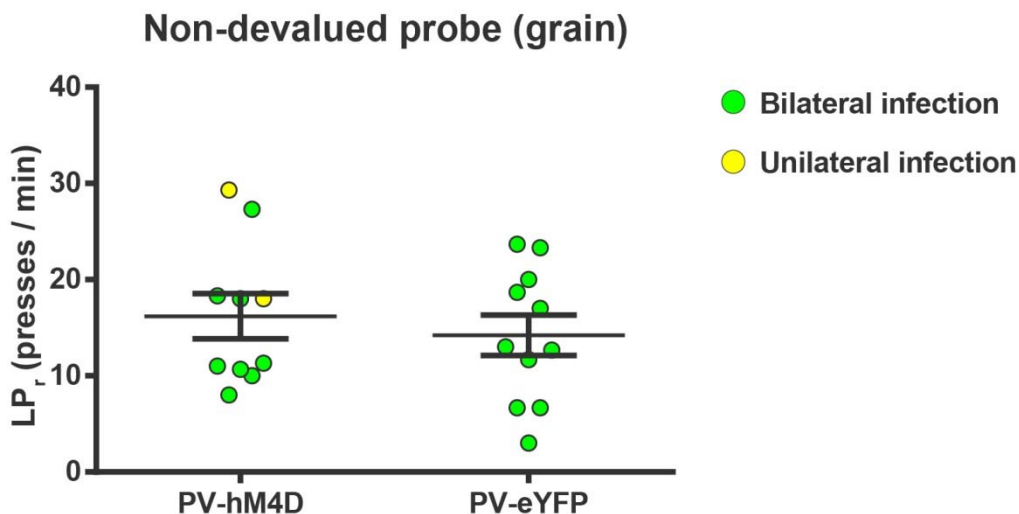

302 **Figure 4 – figure supplement 1.**

**Chemogenetic inhibition of FSIs in dorsolateral striatum does not affect operant lever pressing in general.**

Lever press rates during the non-devalued probe test. Mice from both groups were pre-fed a sensory-specific satiety control pellet (grain-only) and administered CNO (5 mg/kg, intraperitoneally) prior to undergoing a 3 min extinction probe test to assess the effect of inhibiting FSIs on operant behavior independent of sensitivity to outcome value, i.e. habit. Mice expressing hM4D and eYFP in FSIs of the DLS did not differ in response rates ( $p = 0.53$ ,  $n = 10$  &  $11$  mice), indicating that inhibition of DLS FSIs did not affect general lever pressing behavior. Two mice displayed unilateral infection (yellow) as opposed to bilateral (green). Because inclusion or exclusion of these data did not affect statistical results for any behavioral measure, data were included and indicated as above. Data are represented as mean  $\pm$  SEM.

303

304

305 **FSIs exert an inhibitory net effect on striatal output *in vivo* while paradoxically promoting**  
306 **activity in subsets of high-bursting SPNs.**

307

308

309

To understand how chemogenetic suppression of FSI firing affects striatal activity *in vivo*, single unit recordings were performed in a cohort of PV-Cre::Drd1a-tdTomato<sup>26</sup> mice implanted in DLS with multi-electrode arrays and injected with the Cre-dependent hM4D inhibitory chemogenetic

310 virus. Single units corresponding to both FSIs and SPNs were recorded in freely-moving mice (Fig.  
 311 5A-D) for 30 min before intraperitoneal (i.p.) injection of CNO (5 mg/kg) or vehicle and during the  
 312 period of 30-60 min after injection. As expected for the inhibitory hM4D receptor, CNO significantly  
 313 decreased FSI firing rates compared to vehicle-injected controls (CNO:  $59.61 \pm 8.08\%$  baseline;  
 314 vehicle:  $86.89 \pm 11.66\%$  baseline) (Fig. 5E). In line with previous *ex vivo*<sup>13, 14</sup> and *in vivo*<sup>15, 24</sup> studies,  
 315 we further found that suppressing FSI activity caused an overall increase in SPN firing (i.e.  
 316 disinhibitory effect) relative to vehicle (CNO:  $472.00 \pm 149.12\%$ ; vehicle:  $188.02 \pm 45.94\%$ ; Fig. 5F).

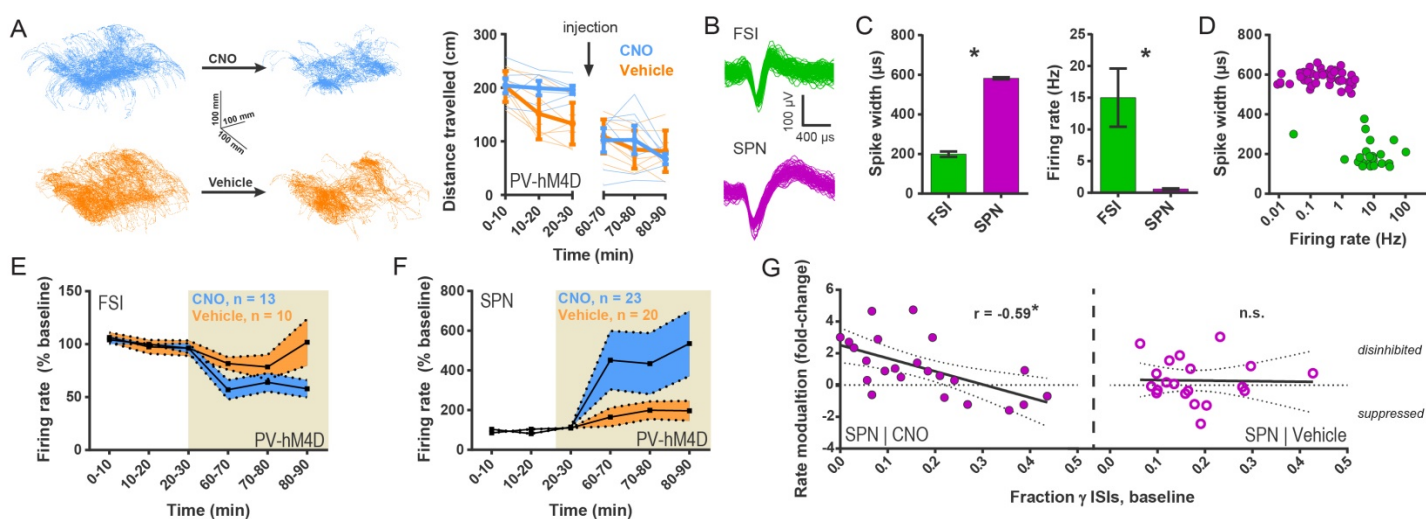

317

**Figure 5**

**Chemogenetic inhibition of FSIs in DLS exerts a strongly disinhibitory net effect and selective excitatory effect on striatal output.**

(A) Locomotion before and after CNO or vehicle administration. Left: Example 3D traces showing head position during 30-minute recordings before and after i.p. injection of CNO (blue) or vehicle (orange). Right: group-wise quantification of distance travelled shows that CNO- and vehicle-treated subjects did not respond differently to i.p. injections ( $p = 0.16$  for interaction of time and treatment,  $n = 6$  &  $7$  mice). Subjects non-specifically decreased locomotor activity following the i.p. injection procedure ( $F(11,1) = 49.01$ ,  $p = 2.27 \times 10^{-5}$ ,  $n = 6$  &  $7$  mice). (B) Representative single-unit waveforms classified as FSIs (top, green) and SPNs (bottom, purple). (C) Waveform properties used for cell type classification. Left: FSI waveforms display a shorter spike width relative to those of SPNs ( $t(64) = 30.67$ ,  $p = 5.53 \times 10^{-40}$ ,  $n = 23$  FSIs &  $43$  SPNs). Right: FSIs display higher firing rates than SPNs ( $t(64) = 4.32$ ,  $p = 0.000056$ ,  $n = 23$  FSIs &  $43$  SPNs). (D) Classification of single units as FSIs (green) or SPNs (purple) by spike width and firing rate. (E) Time course showing FSI firing rates before (white background) and after (tan background) i.p. injection of CNO (blue) or vehicle (orange). CNO injection decreased FSI firing rate relative to vehicle (interaction between drug and time:  $F(5,105) = 2.51$ ,  $p = 0.034$ ,  $n = 13$  &  $10$  FSIs). (F) SPN responses to CNO or vehicle as in (E). CNO injection increased SPN firing rate relative to vehicle (interaction between drug and time:  $F(5,205) = 2.63$ ,  $p = 0.025$ ,  $n = 23$  &  $20$  SPNs). (G) Linear regression of fold-change ( $\log_2$  post/pre) in firing rate after CNO (left) or vehicle (right) injection against the baseline fraction of ISIs in the gamma frequency band. SPNs with higher fractions of gamma-frequency ISIs at baseline are more likely to decrease firing rate when FSIs are inhibited with CNO ( $r(22) = -0.59$ ,  $p = 0.0032$ ,  $n = 23$  cells) whereas vehicle caused no change in firing rate that could be predicted by baseline fraction of gamma ISIs ( $p = 0.92$ ,  $n = 20$  cells). \* $p < 0.05$ . Data are represented as mean  $\pm$  SEM.

318

319 In contrast to the straightforward effect of CNO on FSI activity, the effect of CNO injection on  
 320 SPNs was far more variable. Post-CNO SPN firing rates ranged from 32.5% to 2511.1% of baseline

321 (CV = 147%) with 26% of SPNs displaying negative modulation. In acute slice experiments, FSIs had  
 322 displayed an unexpected and selective effect of promoting multi-action potential responses (Figs. 1D,  
 323 E and 2C) but not otherwise affecting spike probability (Fig. 1 – figure supplement 1). To assess  
 324 whether FSIs also promoted activity in identifiable subsets of SPNs *in vivo*, we analyzed the baseline  
 325 firing patterns in single SPNs prior to CNO injection. SPN spiking was categorized into discrete  
 326 frequency bands by deriving instantaneous firing rate from interspike intervals (ISIs) and was then  
 327 normalized to total number of ISIs for each single unit. This analysis defined the fraction of ISIs  
 328 corresponding to each frequency band for each SPN and was independent of local field potentials.

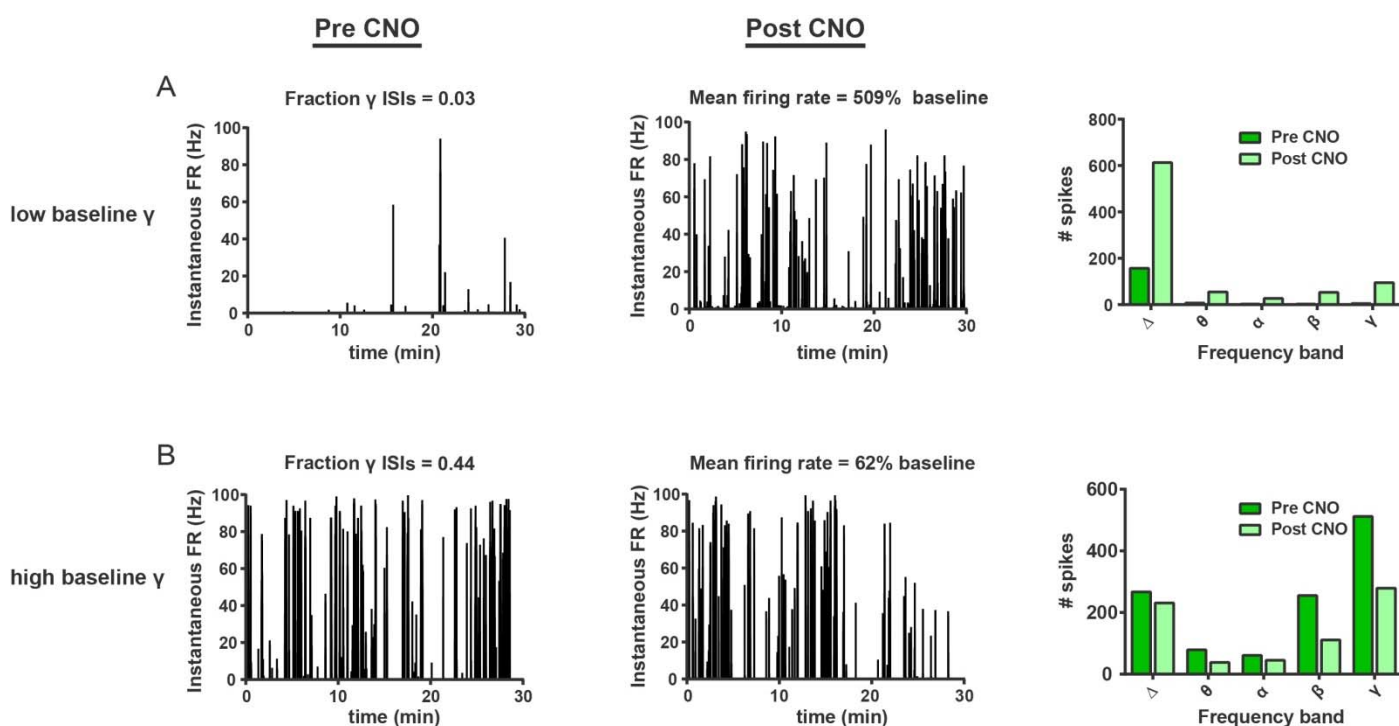

329 **Figure 5 – figure supplement 1.**

**FSIs bidirectionally modulate firing rates as a function of baseline gamma spiking activity in individual SPNs.**

(A) Instantaneous firing rate of a representative low-gamma SPN before (left) and after (middle) i.p. injection of CNO (5 mg/kg). Baseline fraction of gamma-frequency ISIs for this SPN was 0.03 (3% of all ISIs) and inhibition of FSIs via CNO i.p. caused a 509% increase in overall firing rate. Right: raw quantification of spike counts within each frequency band before (dark green) and after (light green) CNO i.p. (B) Instantaneous firing rate, as in (A), of a representative high-gamma SPN. Baseline fraction of gamma-frequency ISIs = 0.44. Suppression of FSI activity decreased firing rate to 62% baseline. Right: raw quantification of spike counts within each frequency band as in (A).

330

331

332

We found that the baseline (pre-CNO) fraction of ISIs falling within the highest rate frequency band, gamma-frequency (30 - 100 Hz), linearly predicted how firing rates in individual SPNs changed

333 when FSI activity was suppressed (Fig. 5G, left; see Fig. 5 – figure supplement 1 for example units).  
334 That is, the higher the fraction of gamma-frequency spikes an SPN fired, the more likely it was to fire  
335 less when FSIs were chemogenetically inhibited. No such relationship was observed in response to  
336 vehicle (Fig. 5G, right).

337

338 Since neurons with higher firing rates would be expected to have shorter ISIs in general, we  
339 examined the possibility that the fraction of gamma ISIs in SPNs might simply relate to mean firing  
340 rate. However, we found that the proportion of gamma-frequency ISIs was unrelated to mean firing  
341 rate in baseline single unit SPN recordings before either CNO or vehicle administration (pre-CNO:  $p =$   
342  $0.25$ ,  $n = 23$ ; pre-vehicle:  $p = 0.28$ ,  $n = 20$ ). Additionally, we found that SPNs fire significantly more  
343 gamma-frequency spikes than expected by Poisson processes matched to firing rate (pre-CNO:  $t(44)$   
344  $= 5.76$ ,  $p = 7.67 \times 10^{-7}$ ,  $n = 23$  SPNs & rate-matched simulations; pre-vehicle:  $t(38) = 8.24$ ,  $p = 5.59 \times$   
345  $10^{-10}$ ,  $n = 20$  SPNs & rate-matched simulations). Whereas baseline firing rates non-specifically predict  
346 fold change in firing rate after both CNO and vehicle injection (CNO:  $r(22) = -0.61$ ,  $p = 0.0022$ ,  $n = 23$ ;  
347 vehicle:  $r(19) = -0.45$ ,  $p = 0.045$ ,  $n = 20$ ), the excess probability of gamma-frequency ISIs (observed –  
348 expected) specifically predicts rate modulation after CNO ( $r(22) = -0.52$ ,  $p = 0.011$ ,  $n = 23$ ) but not  
349 vehicle ( $r(19) = 0.045$ ,  $p = 0.85$ ,  $n = 20$ ). Therefore, gamma-frequency spiking represents a feature of  
350 interest in SPNs that predicts whether these output neurons will fire more or less as a consequence  
351 of reducing FSI activity.

352

353 These results demonstrate that FSIs modulate SPN activity in a more complicated manner  
354 than previously appreciated. While FSIs can have an overall strongly inhibitory effect *in vivo* on SPN  
355 firing as traditionally assumed, we also found evidence that they potentiate activity in a select  
356 population of SPNs that displays higher fractions of gamma-frequency spiking. This selective

357 potentiation may be akin to a winner-take-all “focusing” mechanism that increases the signal-to-noise  
358 ratio in corticostriatal transmission. According to such a mechanism, the subset of recruited SPNs  
359 would be facilitated while the less-relevant, low-gamma SPNs would be suppressed.

## 361 **DISCUSSION**

362 With the recent availability of tools to study specific, genetically-defined types of neurons,  
363 critical roles for interneurons in facilitating behavioral adaptations to experience are becoming  
364 increasingly apparent. In brain regions other than the striatum, interneuron activity appears to most  
365 commonly serve as a gate for the induction of long-lasting plasticity elsewhere in the local circuitry<sup>31-</sup>  
366 <sup>34</sup>. Although the potential for FSIs themselves to exhibit long-lasting activity-dependent plasticity is  
367 well-documented in acute brain slice experiments<sup>20, 22, 35-37</sup>, we are aware of only one report in which  
368 these interneurons were found to undergo experience-dependent plasticity and contribute to the  
369 expression of an adaptive behavior or memory<sup>38</sup>. Here we provide the first such example for striatal  
370 interneurons. We find that FSIs are a site of adaptive plasticity that drives circuit and behavioral  
371 hallmarks of habit. The habit-associated changes in FSI excitability appear distinct (Fig. 3, Fig. 3 –  
372 figure supplement 1) from previously reported plasticity processes which included activity-induced  
373 changes in FSI-SPN synapses selectively at direct pathway SPNs<sup>20</sup> and changes in firing rate related  
374 to the modulation of afterhyperpolarization currents by parvalbumin expression levels<sup>22</sup>. Further  
375 characterizing the plasticity mechanisms we find in habit represents an important area for future  
376 research as it may reveal a useful target for pharmacological modulation of FSI activity.

377  
378 The approach we took to reveal the microcircuit mechanisms for habit was to identify a  
379 potential source for the broad local DLS circuit reorganizations of SPN firing properties that strongly



380 correlate with habit (Fig. 1A, B). To do this, we first examined how FSIs influenced striatal output  
381 using a pharmacological approach that inhibits excitatory synapses on striatal FSIs (and also CINs).  
382 In brain slices from untrained mice, IEM-1460 treatment showed striking specificity in that it  
383 modulated all of the previously described<sup>7</sup> habit-predictive properties of evoked SPN firing *ex vivo*:  
384 gain of dSPN and iSPN responses (Fig. 1D, E), and the relative timing of firing between dSPNs and  
385 iSPNs (Fig. 1F). IEM-1460 also showed specificity in that it did not affect properties such as spike  
386 probability (Fig. 1 – figure supplement 1) that are not predictive of habit.

387

388         Unexpectedly, we found that the directionality by which FSIs modulated these properties was  
389 opposite to our original hypothesis: instead of the expected disinhibition of SPNs, silencing FSIs  
390 reduced SPN output (Fig. 1B-E). FSI inhibition also altered the timing of direct and indirect pathway  
391 neuron firing in a direction that opposed the habit circuit signature (Fig. 1B, F) and closely resembled  
392 previous observations in lever-press trained, goal-directed mice<sup>7</sup>. This suggests that, in DLS, relative  
393 pathway timing is altered with habit formation but not with requisite goal-directed learning. Thus, the  
394 modest nature of the timing shift after pharmacological FSI blockade in untrained mice is likely due to  
395 a floor effect. Altogether, the observed effects of FSIs on SPNs lead to the prediction that an increase  
396 in FSI activity with habit formation would generate the evoked SPN properties that correlate with habit  
397 behavior (Fig. 1B)<sup>7</sup>. Accordingly, in habitual mice, we found that FSI firing was increased, and under  
398 the same cortical afferent stimulation conditions that evoke habit-predictive SPN firing properties (Fig.  
399 3F). This series of observations leads to a model of the striatal circuit basis for habitual behavior  
400 whereby habit formation is accompanied by a long-lasting increase in FSI excitability. In this setting,  
401 incoming cortical activity would be predicted to recruit more FSI activity that would in turn drive more  
402 firing of SPNs and shift their latencies such that direct pathway SPNs would tend to fire relatively  
403 sooner.

404

405 While anatomical and electrophysiological studies have long supported that striatal FSIs are  
406 critical for striatal circuit function<sup>12-18</sup>, an understanding of their specific behavioral contributions is  
407 much less developed. Prior *in vivo* studies have identified correlations of FSI activity with behaviors  
408 involving choice and reward-related actions<sup>39, 40</sup>, while more recent correlations of FSI activity with  
409 head movement velocity suggest another mechanism<sup>41</sup>. In the present study, by chemogenetically  
410 inhibiting PV+ interneurons *in vivo*, we found that FSI activity in DLS is required for the expression of  
411 a learned habit (Fig. 4E); an automated, reward-insensitive behavior quite different from behaviors  
412 previously studied. Previous pharmacological inactivation studies have demonstrated a role for DLS  
413 in habit expression<sup>42, 43</sup>, indicating that general disruption of DLS activity also impairs established  
414 habitual behavior. Interestingly, in the present study, chemogenetic inhibition of FSI activity drove an  
415 overall increase in projection neuron activity (Fig. 5F) which suggests that reducing FSI activity  
416 specifically may impair habit expression differently than a general inactivation of the circuitry.

417

418 While the disruption of habit by chemogenetically inhibiting FSIs supports a critical role for  
419 FSIs in this behavior, this experiment does not identify FSI plasticity as a mechanism for the  
420 expression of habit since artificially manipulating the activity of any cell that plays an otherwise critical  
421 role in the function of an implicated brain region might similarly disrupt behavior. Rather, in this study,  
422 a specific role for FSI plasticity as a mechanism for habit expression is indicated by the observations  
423 that these interneurons modulate those specific striatal output properties that correlate with habit  
424 (Figs. 1 & 2) and show long-lasting changes in excitability after habit learning (Figs. 3D, F).

425

426 Using opto- and chemo-genetic manipulations, we further found that FSIs, which are  
427 GABAergic, enhance activity in subsets of SPNs both in the acute slice and *in vivo*. Although it is  
428 unclear what if any relationship exists between the SPN subpopulations identified *ex vivo* versus *in*  
429 *vivo*, there exist multiple intriguing parallels. In the acute slice, only activity of those SPNs which  
430 displayed burst-like, multi-action potential responses to single-pulse stimuli (“high-firing” SPNs) was  
431 suppressed when FSIs were silenced (Figs. 1D, E and 2C). *In vivo*, the activity of SPNs showing the  
432 highest fractions of gamma-frequency spiking was suppressed, instead of disinhibited, when FSI  
433 activity was chemogenetically reduced (Fig. 5G). In both cases, the SPNs were distinguished by a  
434 higher propensity for burst-like firing patterns. It was further notable that the fraction of SPNs  
435 negatively modulated by reduced FSI activity was similar in both preparations (29% *ex vivo* compared  
436 to 26% *in vivo*). Conversely, we also found that less-active SPNs were not significantly modulated in  
437 the slice (Figs. 1D, E and 2C) and SPNs with less gamma-frequency spiking were disinhibited *in vivo*  
438 when FSI activity was reduced (Fig. 5G). This finding is reminiscent of a previous *in vivo* report that  
439 SPNs with weaker responses to cortical microstimulation displayed the most marked disinhibition  
440 upon GABA<sub>A</sub> receptor blockade<sup>15</sup>. An important future direction will be to determine whether there are  
441 unique biological properties that distinguish the subset of SPNs whose activity is promoted, as  
442 opposed to inhibited, by FSIs.

443  
444 Although an activity-*promoting* effect of GABAergic FSIs may appear counterintuitive, previous  
445 computational<sup>44</sup> and biological<sup>45</sup> studies describe such a phenomenon based in part on the “up” and  
446 “down” resting membrane potential states of SPNs that straddle the chloride reversal potential. While  
447 a voltage-dependent excitatory effect of GABA would not necessarily affect spike probability due to a  
448 concurrent decrease in membrane resistance and the disparity between  $E_{Cl^-}$  and spike threshold,  
449 such an effect could boost the glutamate-driven depolarization of an SPN in its down state<sup>42, 43</sup>.

450 Although disynaptic interneuron microcircuitry is a more common mechanism for disinhibitory effects  
451 of interneurons in other brain regions<sup>33, 46</sup>, some of our observations such as the influence of FSIs on  
452 SPN initial latency to fire (Fig. 1F) are not consistent with the time delay necessitated by a disynaptic  
453 microcircuitry. For this reason, we instead favor a monosynaptic mechanism whereby properties of  
454 SPN resting membrane potential and firing patterns interact to yield activity-promoting effects of FSIs  
455 on SPN subsets.

456  
457       Based on the previous observation that habit-predictive striatal output properties are relatively  
458 uniformly distributed when elicited by strong bulk stimulation of cortical afferents<sup>7</sup>, it became apparent  
459 that habit-related adaptations of DLS broadly augment the propagation of cortical excitation into the  
460 basal ganglia. To confer specificity for certain actions, additional circuit dynamics would ostensibly be  
461 required. We hypothesized that such specificity could arise from the activation of subsets of task-  
462 specific cortical neuron projections that would in turn activate task-specific SPNs<sup>47-49</sup>. Indeed, recent  
463 evidence suggests that spatially-clustered SPN activity encodes information relevant to locomotor  
464 behavior<sup>50</sup>. In habits, one possible mechanism then is that task-specific cortical commands drive<sup>451</sup>,  
465 or at least initiate<sup>52</sup>, high-frequency firing in a cluster/subset of SPNs that would then be preferentially  
466 excited by FSIs. Additionally, in such a mechanism, feed-forward inhibition of less-active SPNs<sup>15</sup> by  
467 FSIs might then serve as a selective filter to further enhance signal-to-noise ratio in corticostriatal  
468 transmission. One testable prediction of this model is that different behaviors would reveal different  
469 subsets of high-gamma SPNs whose activity is promoted by FSIs.

470  
471       Lastly, it is notable that FSIs are also implicated in some pathological settings associated with  
472 compulsive behavior. For example, fewer striatal FSIs, as determined by parvalbumin-  
473 immunopositivity, have been observed in human brains from individuals with Tourette's syndrome<sup>53</sup>

474 and mouse brains in a model of OCD-like behavior<sup>54</sup>. OCD is highly comorbid in Tourette's  
475 syndrome<sup>55</sup> and disrupted habit learning has been implicated in pathological compulsivity in a variety  
476 of settings<sup>56-58</sup>. Interestingly, since both of the above studies defined FSIs by parvalbumin  
477 immunoreactivity, an intriguing alternative view of those results is that parvalbumin levels are below  
478 detection threshold but cell number is not necessarily reduced. Lower parvalbumin levels are  
479 associated with a hyperexcitable FSI phenotype<sup>22</sup>, which is akin to the direction of FSI plasticity we  
480 associate with habit in the present study. Thus, the finding of increased FSI excitability as a plasticity  
481 mechanism driving habitual responding also yields new insights to the potential mechanistic  
482 relatedness of habit and compulsion.

483

## 484 **Materials and methods**

### 485 **Animals**

486 All experiments were carried out under approved animal protocols in accordance with Duke University  
487 Institutional Animal Care and Use Committee standards. Mice were 2 - 4 months of age, in C57Bl/6 genetic  
488 background, and were hemi-/heterozygous for all transgenes. *Drd1a*-tdTomato line 6 BAC transgenic mice  
489 were generated in our laboratory (RRID: IMSR\_JAX:016204)<sup>26</sup>. To optically inhibit PV+ interneurons, a mouse  
490 line expressing Cre under control of the *Parvalbumin* promoter (RRID:IMSR\_JAX:012358) was crossed to the  
491 Ai35D line from Jackson Laboratory which Cre-dependently expressed Arch3.0-GFP  
492 (RRID:IMSR\_JAX:012735). To target PV+ interneurons with Cre-dependent viral vectors, the *Drd1a*-tdTomato  
493 mouse line was crossed to the PV-Cre line to produce experimental progeny hemizygous for *Drd1a*-tdTomato  
494 and heterozygous for PV-Cre.

495

### 496 **Viral vectors**

497 The CAG-FLEX-*rev*-hM4D:2a:GFP plasmid was provided by the Sternson laboratory at Janelia Farm  
498 (Addgene #52536). UNC Viral Vector Core packaged this plasmid into AAV 2/5 and also provided AAV2/5-  
499 EF1a-DIO-EYFP. All viral aliquots had titers above  $1 \times 10^{12}$  particles/mL.

500

### 501 **Intracranial viral injections**

502 Stereotaxic injections were carried out on 2-3 month old PV-Cre::*Drd1a*-tdTomato mice under isoflurane  
503 anesthesia (4% induction, 0.5 - 1.0% maintenance). Meloxicam (2 mg/kg) was administered subcutaneously  
504 after anesthesia induction and prior to surgical procedures for postoperative pain relief. Small craniotomies  
505 were made over the injection sites and 1.0  $\mu$ L virus was delivered bilaterally to dorsolateral striatum via a  
506 Nanoject II (Drummond Scientific) at a rate of 0.1  $\mu$ L/min. The injection pipette was held in place for 5 minutes  
507 following injection and then slowly removed. Coordinates for all injections relative to bregma were as follows:  
508 A/P: + 0.8 mm, M/L:  $\pm$  2.7-2.8 mm, D/V: 3.2 mm. Mice were allowed a minimum of 14 days recovery before  
509 behavioral training. For experiments involving chemogenetic inhibition of FSIs specifically in DLS, mice  
510 showing no expression or poor targeting (misses were medial to DLS) were excluded from the study prior to  
511 behavioral analysis and data unblinding. Two AAV2/5-CAG-FLEX-*rev*-hM4D:2a:GFP-injected mice showed  
512 expression in only one hemisphere of DLS. These mice were included for behavioral analysis and behaved no

513 differently from bilaterally-infected mice. We note that exclusion of these two subjects does not affect the  
514 statistical significance of the result.

### 515 **Lever press training**

516 Prior to training, animals were restricted to 85-90% baseline weight to motivate learning. Lever presses  
517 were rewarded with sucrose-containing pellets (Bio-serv, F05684) and grain-only pellets (Bio-serv, F05934)  
518 were used as a sensory-specific control for satiety. Mice were trained in Med Associates operant chambers  
519 housed within light-resistant, sound-attenuating cabinets (ENV-022MD). Lever presses and food cup entries  
520 were recorded by Med-PC-IV software. During RR reinforcement, pellets were delivered every X times on  
521 average for an RR-X schedule. RI reinforcement gave a 10% probability of reward every X seconds for an RI-X  
522 schedule. Following random reinforcement training, subjects underwent devaluation testing to measure  
523 habitual behavior as previously described<sup>7</sup>. When training schedule was a variable, experiments were  
524 performed with experimenter blind to training schedule.

525 For electrophysiological assessment of FSI properties, acute brain slices were prepared 0-24 hours  
526 after the final training session. Mice were excluded from analysis if they did not display the behavior that was  
527 expected based on training schedule. Specifically, mice that were trained to be habitual (random interval  
528 reinforcement) yet showed sensitivity to outcome devaluation ( $NDLP_r < 0$ ) were excluded.

### 530 **Brain slice preparation**

531 Animals were anesthetized using 2,2,2-tribromoethanol and transcardially perfused with ice-cold *N*-Methyl-D-  
532 glucamine (NMDG) solution<sup>57</sup>. Brains were quickly removed and 300  $\mu$ m thick parasagittal sections were cut in  
533 NMDG solution using a Leica VT1200S. For electrophysiological experiments, slices recovered at 32°C in  
534 NMDG solution for 10-12 minutes and were then transferred to room temperature HEPES-containing holding  
535 solution<sup>57</sup> where they remained for the rest of the experiment. Slices remained undisturbed in the HEPES  
536 holding solution for at least one hour prior to recording. For 2PLSM calcium imaging experiments, slices were  
537 allowed to recover for approximately 45 minutes in NMDG solution at room temperature. Slices were then  
538 transferred to room temperature HEPES holding solution<sup>57</sup> shortly before bulk-loading with fura-2, AM. Cutting  
539 and holding solutions were calibrated to  $305 \pm 1$  mOsm/L. ACSF was calibrated to  $305 \pm 1$  mOsm/L for 2PLSM  
540 calcium imaging and  $315 \pm 2$  mOsm/L for electrophysiological recordings with internal solutions at 295  
541 mOsm/L. Solutions were pH 7.3 - 7.4 and were carbogenated to saturation at all times.

### 543 **Drugs**

544 For electrophysiological recordings, IEM-1460 was dissolved in deionized, distilled water at 200 mM and added  
545 to carbogenated ACSF for a final concentration of 50  $\mu$ M. Picrotoxin was prepared and introduced to recording  
546 solution in an identical manner. For behavioral experiments, CNO was dissolved to 10 mg/mL in DMSO and  
547 diluted in sterile 0.9% saline solution to administer 5 mg/kg per subject with a maximum injection volume of 0.5  
548 mL.

### 550 **Electrophysiological Recordings**

551 Data were acquired using an Axopatch 200B amplifier (Molecular Devices) and a Digidata 1440A digitizer  
552 (Axon Instruments). Data were digitized at 10-20 kHz and low-pass filtered at 2 kHz. Borosilicate glass pipettes  
553 were pulled to 2-5 M $\Omega$  resistance. Slices were continuously perfused with carbogenated ACSF (124 mM NaCl,  
554 4.5mM KCl, 1 mM MgCl<sub>2</sub>·6 H<sub>2</sub>O, 26 mM NaHCO<sub>3</sub>, 1.2 mM NaH<sub>2</sub>PO<sub>4</sub>, 10 mM glucose, 4 mM CaCl<sub>2</sub>) at a  
555 temperature of 29 - 31°C.

556 *Current clamp experiments:* Fast-spiking interneurons were identified by Cre-dependent fluorescence as well  
557 as their characteristically narrow action potential half-width. Current clamp (and cell-attached) recordings were  
558 carried out using a potassium methanesulfonate-based internal solution (140 mM KMeSO<sub>4</sub>, 7.5 mM NaCl, 10  
559 mM NaCl, 10 mM HEPES, 0.2 mM EGTA, 4.2 mM ATP·Mg, 0.4 mM GTP·Na<sub>3</sub>).

560 *Voltage clamp experiments:* Fast-spiking interneurons were identified by Cre-dependent fluorescence as well  
561 as previously reported ranges for input resistance and whole cell capacitance<sup>12</sup>. Voltage clamp recordings  
562 were carried out using a cesium methanesulfonate-based internal solution (120 mM CsOH, 120 mM MeSO<sub>4</sub>, 15  
563 mM CsCl, 8 mM NaCl, 10 mM TEA-Cl, 10 mM HEPES, 2 mM QX-314, 4 mM ATP·Mg, 0.3 mM GTP·Na<sub>3</sub>).

567

568 *Cell-attached experiments:* Stimuli were delivered to cortical afferent fibers at the cortical side of the internal  
569 capsule (Fig. 2A) using a bipolar stimulating electrode (FHC, CBARC75). Responses in SPNs and FSIs were  
570 recorded in cell-attached configuration with voltage clamped at 0 mV. Leak current was continuously monitored  
571 to detect partial break-ins. In the event of a partial membrane rupture, leak currents increased significantly due  
572 to the voltage at which the membrane patch was clamped. In these events, data were discarded. The same  
573 potassium methanesulfonate-based internal solution as in the current clamp experiments was used to enable  
574 break-in and cell type identification or further recordings after cell-attached experiments concluded. All stimuli  
575 were delivered with a 20 second inter-stimulus interval. For input-output experiments, 300  $\mu$ s single-pulse  
576 stimuli were delivered with 5 sweeps per intensity, in order from weakest to strongest intensity, and cells were  
577 recorded at a consistent distance from the stimulating electrode (600 – 650  $\mu$ m). For pre-post experiments with  
578 application of IEM-1460, 300-600  $\mu$ s single-pulse stimuli were delivered to drive multi-action potential  
579 responses prior to drug wash-in. 10 sweeps were analyzed as baseline and another 10 sweeps, using the  
580 same stimulus parameters, following a 20-minute wash-in period were analyzed to measure drug effect.

581

582 *In vitro optical inhibition of FSIs:* 532 nm light was delivered from a diode-pumped solid state laser (Opto  
583 Engine) coupled to a 300  $\mu$ m core, 0.39 NA patch cable which terminated into a 2.5 mm ferrule (Thorlabs Inc.).  
584 The ferrule was submerged in the perfusion chamber and positioned with a micromanipulator to illuminate a  
585  $\sim$ 0.5 mm radius around the tip of the recording pipet. Laser onset coincided with electrical stimulation of  
586 cortical afferents. Laser stimulation lasted 500 ms in whole cell current clamp experiments and 1 sec when  
587 monitoring synaptically-evoked responses in cell-attached mode.

588

589 *In vivo single-unit recordings:* Custom-made multi-electrode arrays were used for all recordings. The arrays  
590 consisted of fine-cut tungsten wires and a 6-cm-long silver grounding wire. Tungsten wires were 35  $\mu$ m in  
591 diameter and 6 mm in length, arranged in a 4  $\times$  4 configuration. The row spacing was 150  $\mu$ m, and electrode  
592 spacing was 150  $\mu$ m. All arrays were attached to the 16-channel Omnetics connector and fixed to the skull with  
593 dental acrylic. After hM4D viral injection into the dorsolateral striatum, the electrode arrays were lowered at the  
594 following stereotaxic coordinates in relation to bregma: 0.8 rostral, 2.75 lateral, and 2.6 mm below brain  
595 surface. Single-unit activity was recorded with miniaturized wireless headstages (Triangle BioSystems  
596 International) using the Cerebus data acquisition system (Blackrock Microsystems), as previously described<sup>58</sup>.  
597 The chronically implanted electrode array was connected to a wireless transmitter cap ( $\sim$ 3.8 g). During  
598 recording sessions, single units were selected using online sorting. Infrared reflective markers (6.35 mm  
599 diameter) were affixed to recording headstages to track mouse position as subjects moved freely on a raised  
600 platform. Marker position was monitored at 100 Hz sampling rate by eight Raptor-H Digital Cameras  
601 (MotionAnalysis Corp.). Before data analysis, the waveforms were sorted again using Offline Sorter (Plexon).  
602 Only single-unit activity with a clear separation from noise was used for the data analysis. In each case, a unit  
603 was only included if action potential amplitude was  $\geq$  5 times that of the noise band. FSIs and SPNs were  
604 classified on the basis of spike width and baseline firing rate (Fig. 5A-D).

605

## 606 **2PLSM calcium imaging of DLS output**

607 Synaptically-evoked action potential firing was monitored in dozens of direct and indirect pathway SPNs  
608 simultaneously as previously described<sup>7</sup> in acute brain slices prepared from untrained *Drd1a*-tdTomato  
609 hemizygous mice<sup>26</sup> aged 2-4 months. Detailed methods are included below.

610

611 *Bulk-loading of fura-2, AM:* Fura-2, AM (Life Technologies, F-1221) was dissolved in a solution of 20% pluronic  
612 acid F-127 (Sigma) in DMSO by vortexing and sonication. The solution was then filtered through a  
613 microcentrifuge tube. Slices were transferred to small loading chambers with room temperature ACSF + 2.5  
614 mM probenecid (osmolality and pH readjusted to 305  $\pm$  1 and 7.3 - 7.4). 1.1  $\mu$ L fura-2, AM solution was slowly  
615 painted directly onto the striatum of each slice. Additional fura-2 AM solution was added as needed to reach a  
616 final DMSO concentration of 0.1% by volume. Slices were incubated in a dark environment for 1 hour at 32 -  
617 33 $^{\circ}$  with continuous carbogenation of the loading chambers. The prolonged 1 hour incubation was found to be  
618 necessary for satisfactory loading in acute slices prepared from adult and aging animals.

619

620 *Selecting field of view and classifying regions of interest:* After the incubation period, slices were moved to  
621 carbogenated HEPES holding solution. Slices remained in holding solution until used for an experiment, at  
622 which point they were moved to a recording chamber and continuously perfused with carbogenated ACSF (124  
623 mM NaCl, 4.5mM KCl, 1 mM MgCl<sub>2</sub>·6 H<sub>2</sub>O, 26 mM NaHCO<sub>3</sub>, 1.2 mM NaH<sub>2</sub>PO<sub>4</sub>, 10 mM glucose, 4 mM CaCl<sub>2</sub>)  
624 at a temperature of 29 - 31°C. To evoke SPN responses, cortical afferents were stimulated in bulk by a bipolar  
625 concentric electrode (FHC, CBARC75) placed at the dorsoanterior edge of the internal capsule (Fig. 1A). A  
626 410 x 410 μm field of view (FoV) was selected by following the cortical fibers along a diagonal ventroposterior  
627 path from the electrode at a distance of 600 - 650 μm. At this distance, SPN action potentials can be evoked  
628 without the cells being directly depolarized<sup>7</sup>. Fura-2 and tdTomato (expressed in dSPNs) were excited  
629 simultaneously at 750 nm (fura-2 isosbestic wavelength) using a Ti:Sapphire laser (Chameleon Ultra 1,  
630 Coherent Inc.). Red and green photons were collected by separate photomultiplier tubes (PMTs) both above  
631 and below the microscope stage. Regions of interest (ROIs) showing red and green were classified as dSPNs  
632 whereas green-only ROIs were classified as iSPNs<sup>7</sup>. The small percentage of green-only cells which would  
633 have been striatal interneurons was partially mitigated by ignoring abnormally large ROIs which were likely to  
634 be cholinergic interneurons. ROIs were manually selected in ImageJ until no ROIs remained in the FoV. A  
635 matrix of ROI centroid coordinates was then imported to PrairieView to generate a linescan vector. If temporal  
636 resolution for the linescan vector fell below the minimum of 12 Hz due to an overabundance of ROIs (and thus  
637 lengthy vector), they were removed in order of increasing light intensity in the green channel. Centroid  
638 coordinates were permanently attributed to each ROI in order to retain spatial information along with SPN  
639 subtype and firing properties.

640  
641 *Population imaging of evoked SPN calcium transients:* Fura-2 signal was measured at each ROI along the  
642 scan path at 770 nm in response to 300 μs, 300 μA single-pulse stimulation of cortical afferents. Images were  
643 acquired at a frequency of 12 - 15 Hz. A diffractive optical element was used to increase signal-to-noise (SLH-  
644 505D-0.23-785, Coherent Inc.)<sup>59</sup>. Photons were collected by a 40X, 0.8 NA LUMPlanFL water immersion  
645 objective lens and Aplanat/Achromatic 1.4 NA oil immersion condenser (Olympus). Red and green photons  
646 were directed to dedicated PMTs by a 575 nm dichroic mirror. Images were acquired via PrairieView image  
647 acquisition software and were time-locked to stimuli by Trigger Sync (Bruker Corp.). Stimuli were delivered 10  
648 times with a 20 sec interstimulus interval. For each ROI, firing properties were calculated at the single-trial level  
649 before being averaged across trials.

## 652 **Data analysis**

653 All experiments and data analyses were performed with experimenter blind to the experimental variable (e.g.  
654 viral construct, training schedule). *A priori* sample sizes were established based on power analyses. Data  
655 exclusion criteria and decisions were made prior to data unblinding.

656  
657 *Cell-attached experiments:* Action potentials were detected in cell-attached mode by cross-correlating data to a  
658 template waveform. Template waveforms were composite action potentials recorded in cell-attached mode  
659 from single neurons that were positively identified as the corresponding cell type in a subsequent whole cell  
660 current clamp recording. The dot product representing a perfect fit was obtained by cross-correlating the  
661 template peak to itself. If the dot product of the data and the template peak was equal or greater than 25% of  
662 this perfect fit, then an action potential was called by a peak detection algorithm (Mathworks, Inc.). Stimulus  
663 artifacts and rare spontaneous action potentials were excluded by only analyzing data from 1 - 100 ms (FSIs)  
664 or 1-600 ms (SPNs) after stimulus delivery. Due to the sharp FSI cell-attached waveform, electrical noise was  
665 matched to the FSI template peak in some recordings. To exclude these false calls, two additional exclusion  
666 criteria were added: action potentials were excluded (1) if their amplitudes were less than 10 standard  
667 deviations of the recording minus the stimulus artifact, i.e. electrical noise and (2) if their cross-correlation peak  
668 amplitudes were less than 25% of the maximum peak in a given sweep.

669  
670 *Current-clamp experiments:* Action potentials were detected by running a peak detection algorithm (Mathworks  
671 Inc.) on voltage velocity data with a peak threshold of  $1 \times 10^4$  V/s and a minimum peak distance of 2 ms. Action  
672 potential onset and offset were defined at the intersections of the waveform with a sliding mean baseline  
673 voltage that constituted 10% of the length of the current injection. Action potential and after-hyperpolarization



674 properties were measured up to the point when increasing current injection attenuated firing rate. Action  
675 potential half-width was defined as half the time between onset and peak voltage. Action potential amplitude  
676 was defined as the voltage difference between the sliding baseline and peak amplitude. AHP potential onset  
677 and offset were defined as the next two intersections with the sliding baseline after the action potential peak  
678 voltage. AHP amplitude was defined as the negative-most voltage between onset and offset and the AHP  
679 waveform was integrated over the sliding baseline for total voltage. AHP voltage measurements were  
680 converted to current using input resistance. Firing rates were measured in response to a series of increasing  
681 500 ms current step amplitudes ranging from -0.4 to 2.0 nA in 200 pA intervals. Maximum response duration  
682 was defined as the longest period of sustained firing observed during this series of current injections.  
683 Rheobase was determined by identifying the 200 pA interval in which the first action potential was fired and  
684 subsequently interrogating this interval with 500 ms current injections at 10 pA resolution. Subthreshold test  
685 pulses were used to determine passive membrane properties. Input resistance was calculated as  $R_i = dV/I$ .  
686 Whole cell capacitance was calculated by integrating the decay phase after current injection to measure  
687 discharged current and dividing by voltage of the current injection:  $\int V_{\text{decay}}/IR_i^2$ . Series resistance was calculated  
688 by fitting a standard double-exponential function to the decay transient and deriving the time constant  $\tau = 1/\lambda_{\text{fast}}$   
689 to find  $\tau_{\text{fast}} = R_s \times C_{\text{whole cell}}$ . Cells with  $R_s > 30$  megaOhms were excluded from analysis.  
690

691 *Voltage clamp experiments:* Voltage clamp experiments assessing habit-related FSI physiology were carried  
692 out in the presence of picrotoxin (50  $\mu\text{M}$ ). Paired pulse ratio was calculated as  $\log_2(\text{EPSC}_2/\text{EPSC}_1)$  for first and  
693 second EPSC amplitudes. Paired stimuli were delivered 50 ms apart. Spontaneous EPSCs were recorded at  
694  $V_m = -70$  mV at 5X gain for 5 minutes per cell. Automated event detection was performed using MiniAnalysis  
695 (Synaptosoft). To validate the use of PV-Arch, 532 nm light-induced currents were recorded in FSI and SPNs  
696 in the presence of gabazine (10  $\mu\text{M}$ ), AP5 ( $\mu\text{M}$ ), and NBQX (50  $\mu\text{M}$ ) to block GABA<sub>A</sub>, NMDA, and AMPA  
697 receptors, respectively.  
698  
699

700 *In vivo single-unit recordings:* Single unit activity was sorted into frequency bins by converting interspike  
701 intervals to instantaneous firing rates. Frequency bands were defined as  $\Delta = 0\text{-}4$  Hz,  $\theta = 4\text{-}8$  Hz,  $\alpha = 8\text{-}13$  Hz,  $\beta$   
702  $= 13\text{-}30$  Hz, and  $\gamma = 30\text{-}100$  Hz. The fraction of ISIs falling in a particular frequency band was calculated  
703 relative to the total number of ISIs. To compare frequency band distributions of single unit records to rate-  
704 matched Poisson processes, for each single unit with N ISIs, N points were randomly drawn from a Poisson  
705 distribution with  $\lambda$  set to the mean ISI (1 / mean firing rate) for the corresponding single unit. This simulation  
706 was run 20 times per single unit. All 20 simulations were binned according to the described frequency band  
707 bounds and normalized counts were averaged across simulations. Since each simulated unit corresponded to  
708 a real recording with mean firing rate =  $1/\lambda$ , observed and simulated data were compared via multiple paired t-  
709 tests and Bonferroni-Sidak correction for multiple comparisons. For behavioral analysis, 3D tracking data were  
710 transformed into Cartesian coordinates (x, y and z) by the Cortex software (MotionAnalysis Corp.) to allow  
711 distance calculations.  
712

713 *2PLSM calcium imaging:* Raw frames were corrected using a drift correction algorithm<sup>60</sup> to control for minor  
714 fluctuations in X and Y. Baseline fluorescence was measured over a 2 second sliding window to calculate  
715 change in fluorescence over baseline ( $\Delta F/F_0$ ). Action potentials were detected using a cross-correlation  
716 approach as described for current clamp and cell-attached recordings above. The template peak was  
717 generated by simultaneous calcium imaging + cell-attached electrophysiological experiments and represented  
718 a single action potential<sup>7</sup>. Detected peaks possessed dot-products at least 50% that of a perfect fit (cross-  
719 correlating template to itself). Although dSPN and iSPN calcium transients are similar in these experimental  
720 conditions<sup>7</sup>, separate template peaks corresponding to the SPN subtype classification of each ROI were used.  
721 Additional inclusion criteria beyond the cross-correlation threshold were used at the level of event detection,  
722 ROI inclusion, and slice inclusion to maximize data quality and reliability. Detected events were included as  
723 evoked responses only if they occurred within 375 ms of stimulation- any other events were excluded from  
724 analysis. Additionally, a lockout window was set in the peak detection algorithm to ensure that no event could  
725 occur within 1 second of the previously detected event. For an ROI to be included, a noise threshold was  
726 empirically determined to avoid excessive false event detection: the standard deviation of the  $\Delta F/F_0$  signal  
727 could not equal or exceed 0.0575. Additionally, ROIs were excluded if fluorescence was saturating, if they had

drifted from the scan path such that signal was no longer detected, if they did not respond at least once to a supra-threshold stimulus (1.5 mA) delivered 10 times at the end of the experiment, and if the ratio of non-evoked to evoked events detected at this suprathreshold stimulation intensity was greater than 4.5. These parameters were tested against multiple data sets from simultaneous calcium imaging and cell-attached recording experiments as previously reported<sup>7</sup> and were found to create an optimal balance of minimizing false detections and maximizing correct detections. Finally, slices which displayed poor loading, likely due to poor slice health or experimenter error during bulk-loading, were excluded from analysis. Each slice was required to have at least 12 SPNs of each subtype that passed all other exclusion criteria. This criterion was determined by finding the  $N$  at which coefficient of variation (CV) became a linear function of sample size, i.e. decreased only due to the CV denominator and not undersampling.

To analyze a pre-post effect within cell, such as wash-in of IEM-1460, only ROIs which were present and passed exclusion criteria both in pre and post recordings were included in analysis (See Fig. 1C for matching ROIs before and after). Thus, drug effect was calculated for each individual cell using an internal baseline. Spike probability was calculated as the fraction of trials in which an evoked response was detected. Amplitude of an evoked calcium transient was calculated as the maximum  $\Delta F/F_0$  in the transient waveform. Latency was calculated as the time between stimulus delivery and the time at which the cross-correlation dot-product reached half that of the perfect fit, i.e. the time of peak detection. When calculating dSPN/iSPN ratios,

SEM was derived as:  $\log_2 \left( \frac{dSPN}{iSPN} \right) \sqrt{\frac{CV_{dSPN}^2 + CV_{iSPN}^2}{N}}$ . All analysis functions were custom-made in MATLAB unless otherwise noted.

To classify SPNs as “high-firing” or “low-firing” prior to application of IEM-1460 (Fig. 1D), baseline calcium transient amplitudes for each SPN subtype were separated into two clusters according to a Gaussian mixture model (GMM). The effect of IEM-1460 was then calculated separately for “high-firing” and “low-firing” SPNs of each subtype and significance was determined using paired t-tests. In fitting the GMMs for dSPNs and iSPNs, the only user-specified input was the number of clusters ( $k = 2$ ).

## Statistics

F statistics were calculated using repeated measures analysis of variance. For within-cell comparisons, t statistics were calculated by paired, two-sided t-tests. Otherwise, unpaired, two-sided t-tests were used. For non-normal data sets, Mann-Whitney U tests were used. All r values were obtained using Pearson correlation analyses. Normality was measured using the Kolmogorov-Smirnoff test of the data against a hypothetical normal cumulative distribution function. Unless otherwise indicated (e.g. Fig. 2C, right panel), N values denote number of replicates considered biologically distinct for statistical measures<sup>61</sup> (see Table 1 for further detail). Technical replicates within a single biological sample were averaged to obtain a single value. For all statistical tests, confidence interval was set to  $\alpha = 0.05$ .

770

771

772

773

774

775

776

777

778

779

| Figure       | Cells                | Slices | Mice |
|--------------|----------------------|--------|------|
| 1D           | 139                  | 5      | 2    |
| 1E           | 139                  | 5      | 2    |
| 1F           | 52 independent pairs | 5      | 2    |
| 2B           | 6                    | 5      | 3    |
| 2C           | 13                   | 11     | 6    |
| 3A           | 22                   | 21     | 12   |
| 3B           | 23                   | 21     | 12   |
| 3C           | 24                   | 20     | 12   |
| 3D           | 24                   | 20     | 12   |
| 3E           | 24                   | 20     | 12   |
| 3F           | 24                   | 23     | 12   |
| 4C           | N/A                  | N/A    | 21   |
| 4E           | N/A                  | N/A    | 21   |
| 5A           | N/A                  | N/A    | 11   |
| 5C           | 66                   | N/A    | 11   |
| 5E           | 23                   | N/A    | 11   |
| 5F           | 43                   | N/A    | 11   |
| 5G (CNO)     | 23                   | N/A    | 5    |
| 5G (Vehicle) | 20                   | N/A    | 6    |

|                                        |                                  |     |    |
|----------------------------------------|----------------------------------|-----|----|
| 1 - figure supplement 1A               | 6                                | 6   | 1  |
| 1 - figure supplement 1B               | 139                              | 5   | 2  |
| 1 - figure supplement 2 (IEM)          | 8                                | 8   | 6  |
| 1 - figure supplement 2 (Veh)          | 8                                | 8   | 5  |
| 2 - figure supplement 1B               | 4                                | 4   | 2  |
| 2 - figure supplement 1C               | 6                                | 6   | 4  |
| 2 - figure supplement 1E               | 5                                | 5   | 2  |
| 2 - figure supplement 1F               | 8                                | 7   | 1  |
| 3 - figure supplement 1A               | N/A                              | N/A | 16 |
| 3 - figure supplement 1B               | N/A                              | N/A | 16 |
| 3 - figure supplement 1C               | N/A                              | N/A | 12 |
| 3 - figure supplement 1D               | N/A                              | N/A | 12 |
| 3 - figure supplement 1E               | 24                               | 20  | 12 |
| 3 - figure supplement 1F               | 24                               | 20  | 12 |
| 3 - figure supplement 1G               | 24                               | 20  | 12 |
| 3 - figure supplement 1H               | 24                               | 20  | 12 |
| 3 - figure supplement 1I               | 21                               | 19  | 12 |
| 4 - figure supplement 1                | N/A                              | N/A | 21 |
| 5 - figure supplement 2A (Pre CNO)     | 23                               | N/A | 5  |
| 5 - figure supplement 2A (Pre Vehicle) | 20                               | N/A | 6  |
| 5 - figure supplement 2B (Pre CNO)     | 23 + 23 rate-matched simulations | N/A | 5  |
| 5 - figure supplement 2B (Pre Vehicle) | 20 + 20 rate-matched simulations | N/A | 6  |

**Table 1.**

**Details of sample sizes.**

Table showing source of sample sizes for each subfigure in the study. Ex: Fig. 2C shows N= 13 cells from 11 slices and 6 mice.

780

781

782

783

**Acknowledgments**

784

785

786

787

788

The authors thank L. Glickfeld, M. Rossi, and M.B. Branch for their productive discussions and comments on the manuscript. The authors thank S. Sternson for providing the CAG-FLEX-*rev*-hM4D:2a:GFP plasmid and the UNC Viral Vector Core for production of viruses. We gratefully acknowledge the following sources of funding: NS064577 (N.C.), ARRA supplement to NS064577 (N.C.), AA021075 (H.Y.), McKnight Foundation (N.C., H.Y.), GM008441-23 (J.O.), NS051156 (K.A.),

789 The Brain and Behavior Foundation (K.A.), The Tourette Association of America (K.A.) and the Ruth

790 K. Broad Foundation (J.O.).

791

792 **Competing interests**

793 The authors declare no competing financial interests.

794

## 795 REFERENCES

- 796 1. Freiman, I., Anton, A., Monyer, H., Urbanski, M.J. & Szabo, B. Analysis of the effects of cannabinoids on  
797 identified synaptic connections in the caudate-putamen by paired recordings in transgenic mice. *The Journal of*  
798 *Physiology* **575**, 789-806 (2006).
- 799 2. Yin, H.H. & Balleine, B. Lesions of dorsolateral striatum preserve outcome expectancy but disrupt habit  
800 formation in instrumental learning. *European Journal of Neuroscience* **19**, 181-189 (2004).
- 801 3. Yin, H., Knowlton, B. & Balleine, B. Inactivation of dorsolateral striatum enhances sensitivity to changes in the  
802 action–outcome contingency in instrumental conditioning. *Behavioural Brain Research* **166**, 189-196 (2006).
- 803 4. Tang, C., Pawlak, A.P., Prokopenko, V. & West, M.O. Changes in activity of the striatum during formation of a  
804 motor habit. *European Journal of Neuroscience* **25**, 1212-1227 (2007).
- 805 5. Jog, M.S. Building Neural Representations of Habits. *Science* **286**, 1745-1749 (1999).
- 806 6. Shan, Q., Christie, M.J. & Balleine, B.W. Plasticity in striatopallidal projection neurons mediates the acquisition of  
807 habitual actions. *European Journal of Neuroscience* **42**, 2097-2104 (2015).
- 808 7. O’Hare, J.K., Ade, K.K., Sukharnikova, T., Van Hooser, S.D., Palmeri, M.L., Yin, H.H. & Calakos, N. Pathway-specific  
809 striatal substrates for habitual behavior. *Neuron* **89**, 472-479 (2016).
- 810 8. Shen, W., Flajolet, M., Greengard, P. & Surmeier, D.J. Dichotomous dopaminergic control of striatal synaptic  
811 plasticity. *Science* **321**, 848-851 (2008).
- 812 9. Nazzaro, C., Greco, B., Cerovic, M., Baxter, P., Rubino, T., Trusel, M., Parolaro, D., Tkatch, T., Benfenati, F.,  
813 Pedarzani, P. & Tonini, R. SK channel modulation rescues striatal plasticity and control over habit in cannabinoid  
814 tolerance. *Nature Neuroscience* **15**, 284-293 (2012).
- 815 10. Kawaguchi, Y., Wilson, C.J., Augood, S.J. & Emson, P.C. Striatal interneurons: chemical, physiological and  
816 morphological characterization. *Trends in neurosciences* **18**, 527-535 (1995).
- 817 11. Tepper, J.M., Tecuapetla, F., Koós, T. & Ibáñez-Sandoval, O. Heterogeneity and diversity of striatal GABAergic  
818 interneurons. *Frontiers in neuroanatomy* **4**, 150 (2010).
- 819 12. Gittis, A.H., Nelson, A.B., Thwin, M.T., Palop, J.J. & Kreitzer, A.C. Distinct Roles of GABAergic Interneurons in the  
820 Regulation of Striatal Output Pathways. *Journal of Neuroscience* **30**, 2223-2234 (2010).
- 821 13. Koos, T. & Tepper, J.M. Inhibitory control of neostriatal projection neurons by GABAergic interneurons. *Nat*  
822 *Neurosci* **2**, 467-472 (1999).
- 823 14. Koos, T. Comparison of IPSCs Evoked by Spiny and Fast-Spiking Neurons in the Neostriatum. *Journal of*  
824 *Neuroscience* **24**, 7916-7922 (2004).
- 825 15. Mallet, N. Feedforward Inhibition of Projection Neurons by Fast-Spiking GABA Interneurons in the Rat Striatum  
826 In Vivo. *Journal of Neuroscience* **25**, 3857-3869 (2005).
- 827 16. Taverna, S., Canciani, B. & Pennartz, C.M.A. Membrane properties and synaptic connectivity of fast-spiking  
828 interneurons in rat ventral striatum. *Brain Research* **1152**, 49-56 (2007).
- 829 17. Straub, C., Saulnier, J.L., Bègue, A., Feng, D.D., Huang, K.W. & Sabatini, B.L. Principles of Synaptic Organization of  
830 GABAergic Interneurons in the Striatum. *Neuron* **92**, 84-92 (2016).
- 831 18. Szydlowski, S.N., Pollak Dorocic, I., Planert, H., Carlen, M., Meletis, K. & Silberberg, G. Target Selectivity of  
832 Feedforward Inhibition by Striatal Fast-Spiking Interneurons. *Journal of Neuroscience* **33**, 1678-1683 (2013).
- 833 19. Gerfen, C.R. The neostriatal mosaic. I. Compartmental organization of projections from the striatum to the  
834 substantia nigra in the rat. *Journal of Comparative Neurology* **236**, 454-476 (1985).
- 835 20. Mathur, B.N., Tanahira, C., Tamamaki, N. & Lovinger, D.M. Voltage drives diverse endocannabinoid signals to  
836 mediate striatal microcircuit-specific plasticity. *Nature Neuroscience* **16**, 1275-1283 (2013).
- 837 21. Winters, B.D., Krüger, J.M., Huang, X., Gallaher, Z.R., Ishikawa, M., Czaja, K., Krueger, J.M., Huang, Y.H., Schlüter,  
838 O.M. & Dong, Y. Cannabinoid receptor 1-expressing neurons in the nucleus accumbens. *Proceedings of the national*  
839 *academy of sciences* **109**, E2717-E2725 (2012).
- 840 22. Orduz, D., Bishop, D.P., Schwaller, B., Schiffmann, S.N. & Gall, D. Parvalbumin tunes spike-timing and efferent  
841 short-term plasticity in striatal fast spiking interneurons. *J Physiol* **591**, 3215-3232 (2013).
- 842 23. Gittis, A.H., Hang, G.B., LaDow, E.S., Shoenfeld, L.R., Atallah, B.V., Finkbeiner, S. & Kreitzer, A.C. Rapid target-  
843 specific remodeling of fast-spiking inhibitory circuits after loss of dopamine. *Neuron* **71**, 858-868 (2011).

- 844 24. Gittis, A.H., Leventhal, D.K., Fensterheim, B.A., Pettibone, J.R., Berke, J.D. & Kreitzer, A.C. Selective inhibition of  
845 striatal fast-spiking interneurons causes dyskinesias. *The Journal of neuroscience* **31**, 15727-15731 (2011).
- 846 25. Hollmann, M., Hartley, M. & Heinemann, S. Ca<sup>2+</sup> permeability of KA-AMPA-gated glutamate receptor channels  
847 depends on subunit composition. *Science* **252**, 851-853 (1991).
- 848 26. Ade, K.K., Wan, Y., Chen, M., Gloss, B. & Calakos, N. An Improved BAC Transgenic Fluorescent Reporter Line for  
849 Sensitive and Specific Identification of Striatonigral Medium Spiny Neurons. *Frontiers in systems neuroscience* **5**, 32  
850 (2011).
- 851 27. Dickinson, A., Nicholas, D.J. & Adams, C.D. The effect of the instrumental training contingency on susceptibility to  
852 reinforcer devaluation. *The Quarterly Journal of Experimental Psychology* **35**, 35-51 (1983).
- 853 28. Hilário, M.R.F., Clouse, E., Yin, H.H. & Costa, R.M. Endocannabinoid signaling is critical for habit formation.  
854 *Frontiers in Integrative Neuroscience* **1** (2007).
- 855 29. Dickinson, A. Actions and Habits: The Development of Behavioural Autonomy. *Philosophical Transactions of the*  
856 *Royal Society B: Biological Sciences* **308**, 67-78 (1985).
- 857 30. Armbruster, B.N., Li, X., Pausch, M.H., Herlitze, S. & Roth, B.L. Evolving the lock to fit the key to create a family of  
858 G protein-coupled receptors potentially activated by an inert ligand. *Proceedings of the National Academy of Sciences of*  
859 *the United States of America* **104**, 5163-5168 (2007).
- 860 31. Kuhlman, S.J., Olivas, N.D., Tring, E., Ikrar, T., Xu, X. & Trachtenberg, J.T. A disinhibitory microcircuit initiates  
861 critical-period plasticity in the visual cortex. *Nature* **501**, 543-546 (2013).
- 862 32. Kvitsiani, D., Ranade, S., Hangya, B., Taniguchi, H., Huang, J. & Kepecs, A. Distinct behavioural and network  
863 correlates of two interneuron types in prefrontal cortex. *Nature* **498**, 363-366 (2013).
- 864 33. Wolff, S.B., Gründemann, J., Tovote, P., Krabbe, S., Jacobson, G.A., Müller, C., Herry, C., Ehrlich, I., Friedrich, R.W.  
865 & Letzkus, J.J. Amygdala interneuron subtypes control fear learning through disinhibition. *Nature* **509**, 453-458 (2014).
- 866 34. Yazaki-Sugiyama, Y., Kang, S., Cateau, H., Fukai, T. & Hensch, T.K. Bidirectional plasticity in fast-spiking GABA  
867 circuits by visual experience. *Nature* **462**, 218-221 (2009).
- 868 35. Hainmuller, T., Kriegstein, K., Kulik, A. & Bartos, M. Joint CP-AMPA and group I mGlu receptor activation is  
869 required for synaptic plasticity in dentate gyrus fast-spiking interneurons. *Proc Natl Acad Sci U S A* **111**, 13211-13216  
870 (2014).
- 871 36. Sarihi, A., Mirnajafi-Zadeh, J., Jiang, B., Sohya, K., Safari, M.S., Arami, M.K., Yanagawa, Y. & Tsumoto, T. Cell type-  
872 specific, presynaptic LTP of inhibitory synapses on fast-spiking GABAergic neurons in the mouse visual cortex. *The*  
873 *Journal of neuroscience : the official journal of the Society for Neuroscience* **32**, 13189-13199 (2012).
- 874 37. Dehorter, N., Ciceri, G., Bartolini, G., Lim, L., del Pino, I. & Marín, O. Tuning of fast-spiking interneuron properties  
875 by an activity-dependent transcriptional switch. *Science* **349**, 1216-1220 (2015).
- 876 38. Donato, F., Rompani, S.B. & Caroni, P. Parvalbumin-expressing basket-cell network plasticity induced by  
877 experience regulates adult learning. *Nature* **504**, 272-276 (2013).
- 878 39. Gage, G.J., Stoetznner, C.R., Wiltschko, A.B. & Berke, J.D. Selective activation of striatal fast-spiking interneurons  
879 during choice execution. *Neuron* **67**, 466-479 (2010).
- 880 40. Schmitzer-Torbert, N.C. & Redish, A.D. Task-dependent encoding of space and events by striatal neurons is  
881 dependent on neural subtype. *Neuroscience* **153**, 349-360 (2008).
- 882 41. Packard, M.G. & McGaugh, J.L. Inactivation of hippocampus or caudate nucleus with lidocaine differentially  
883 affects expression of place and response learning. *Neurobiology of learning and memory* **65**, 65-72 (1996).
- 884 42. Corbit, L.H., Nie, H. & Janak, P.H. Habitual alcohol seeking: time course and the contribution of subregions of the  
885 dorsal striatum. *Biological psychiatry* **72**, 389-395 (2012).
- 886 43. Kim, N., Barter, J.W., Sukharnikova, T. & Yin, H.H. Striatal firing rate reflects head movement velocity. *European*  
887 *Journal of Neuroscience* **40**, 3481-3490 (2014).
- 888 44. Humphries, M.D., Wood, R. & Gurney, K. Dopamine-modulated dynamic cell assemblies generated by the  
889 GABAergic striatal microcircuit. *Neural Networks* **22**, 1174-1188 (2009).
- 890 45. Bracci, E. & Panzeri, S. Excitatory GABAergic effects in striatal projection neurons. *Journal of neurophysiology* **95**,  
891 1285-1290 (2006).
- 892 46. Lovett-Barron, M., Turi, G.F., Kaifosh, P., Lee, P.H., Bolze, F., Sun, X.-H., Nicoud, J.-F., Zemelman, B.V., Sternson,  
893 S.M. & Losonczy, A. Regulation of neuronal input transformations by tunable dendritic inhibition. *Nature neuroscience*  
894 **15**, 423-430 (2012).

- 895 47. Rothwell, P.E., Hayton, S.J., Sun, G.L., Fuccillo, M.V., Lim, B.K. & Malenka, R.C. Input-and output-specific  
896 regulation of serial order performance by corticostriatal circuits. *Neuron* **88**, 345-356 (2015).
- 897 48. Carelli, R.M. & West, M.O. Representation of the body by single neurons in the dorsolateral striatum of the  
898 awake, unrestrained rat. *Journal of Comparative Neurology* **309**, 231-249 (1991).
- 899 49. Gremel, C.M., Chancey, J.H., Atwood, B.K., Luo, G., Neve, R., Ramakrishnan, C., Deisseroth, K., Lovinger, D.M. &  
900 Costa, R.M. Endocannabinoid modulation of orbitostriatal circuits gates habit formation. *Neuron* **90**, 1312-1324 (2016).
- 901 50. Barbera, G., Liang, B., Zhang, L., Gerfen, Charles R., Culurciello, E., Chen, R., Li, Y. & Lin, D.-T. Spatially Compact  
902 Neural Clusters in the Dorsal Striatum Encode Locomotion Relevant Information. *Neuron* **92**, 202-213 (2016).
- 903 51. Smith, K.S., Virkud, A., Deisseroth, K. & Graybiel, A.M. Reversible online control of habitual behavior by  
904 optogenetic perturbation of medial prefrontal cortex. *Proceedings of the National Academy of Sciences* **109**, 18932-  
905 18937 (2012).
- 906 52. Berke, J.D., Okatan, M., Skurski, J. & Eichenbaum, H.B. Oscillatory Entrainment of Striatal Neurons in Freely  
907 Moving Rats. *Neuron* **43**, 883-896 (2004).
- 908 53. Kalanithi, P.S.A., Zheng, W., Kataoka, Y., DiFiglia, M., Grantz, H., Saper, C.B., Schwartz, M.L., Leckman, J.F. &  
909 Vaccarino, F.M. Altered parvalbumin-positive neuron distribution in basal ganglia of individuals with Tourette syndrome.  
910 *Proceedings of the National Academy of Sciences of the United States of America* **102**, 13307-13312 (2005).
- 911 54. Burguiere, E., Monteiro, P., Feng, G. & Graybiel, A.M. Optogenetic Stimulation of Lateral Orbitofronto-Striatal  
912 Pathway Suppresses Compulsive Behaviors. *Science* **340**, 1243-1246 (2013).
- 913 55. Sheppard, D.M., Bradshaw, J.L., Purcell, R. & Pantelis, C. Tourette's and comorbid syndromes: obsessive  
914 compulsive and attention deficit hyperactivity disorder. A common etiology? *Clinical Psychology Review* **19**, 531-552  
915 (1999).
- 916 56. Graybiel, A.M. Habits, Rituals, and the Evaluative Brain. *Annual Review of Neuroscience* **31**, 359-387 (2008).
- 917 57. Everitt, B.J. & Robbins, T.W. Neural systems of reinforcement for drug addiction: from actions to habits to  
918 compulsion. *Nat Neurosci* **8**, 1481-1489 (2005).
- 919 58. Gerdeman, G.L. & Lovinger, D.M. It could be habit forming: drugs of abuse and striatal synaptic plasticity. *TINS*  
920 **26**, 184-192 (2003).
- 921 59. Ting, J.T., Daigle, T.L., Chen, Q. & Feng, G. Acute brain slice methods for adult and aging animals: application of  
922 targeted patch clamp analysis and optogenetics. *Methods in molecular biology (Clifton, N.J.)* **1183**, 221-242 (2014).
- 923 60. Fan, D., Rich, D., Holtzman, T., Ruther, P., Dalley, J.W., Lopez, A., Rossi, M.A., Barter, J.W., Salas-Meza, D.,  
924 Herwik, S., Holzhammer, T., Morizio, J. & Yin, H.H. A Wireless Multi-Channel Recording System for Freely Behaving Mice  
925 and Rats. *PLoS ONE* **6**, e22033 (2011).
- 926 61. Watson, B.O., Nikolenko, V. & Yuste, R. Two-photon imaging with diffractive optical elements. *Frontiers in neural*  
927 *circuits* **3**, 6 (2009).
- 928 62. Li, Y., Van Hooser, S.D., Mazurek, M., White, L.E. & Fitzpatrick, D. Experience with moving visual stimuli drives  
929 the early development of cortical direction selectivity. *Nature* **456**, 952-956 (2008).
- 930 63. Blainey, P., Krzywinski, M. & Altman, N. Points of Significance: Replication. *Nat Meth* **11**, 879-880 (2014).
